# Supplementary material for: Prognostic impact of combined non-severe aortic stenosis and mitral regurgitation on clinical outcomes: a single-centre retrospective study
Source: PubMed Central journal article supplement — BMJ Open. 2024 Mar 29;14(3):e080914. doi: 10.1136/bmjopen-2023-080914 (PMC10982784; doi:10.1136/bmjopen-2023-080914), 2024-03-29
Supplement: bmjopen-2023-080914.draft_revisions.pdf [file bmjopen-2023-080914.draft_revisions.pdf]

# BMJ Open

BMJ Open is committed to open peer review. As part of this commitment we make the peer review history of every article we publish publicly available.

When an article is published we post the peer reviewers' comments and the authors' responses online. We also post the versions of the paper that were used during peer review. These are the versions that the peer review comments apply to.

The versions of the paper that follow are the versions that were submitted during the peer review process. They are not the versions of record or the final published versions. They should not be cited or distributed as the published version of this manuscript.

BMJ Open is an open access journal and the full, final, typeset and author-corrected version of record of the manuscript is available on our site with no access controls, subscription charges or pay-per-view fees (<http://bmjopen.bmj.com>).

If you have any questions on BMJ Open's open peer review process please email [info.bmjopen@bmj.com](mailto:info.bmjopen@bmj.com)

# BMJ Open

## The Effect of Combined Non-Severe Aortic Stenosis and Mitral Regurgitation on Clinical Outcomes

|                               |                                                                                                                                                                                                                                                                                                                                                                                                                                                                                                                                                                                            |
|-------------------------------|--------------------------------------------------------------------------------------------------------------------------------------------------------------------------------------------------------------------------------------------------------------------------------------------------------------------------------------------------------------------------------------------------------------------------------------------------------------------------------------------------------------------------------------------------------------------------------------------|
| Journal:                      | <i>BMJ Open</i>                                                                                                                                                                                                                                                                                                                                                                                                                                                                                                                                                                            |
| Manuscript ID                 | bmjopen-2023-080914                                                                                                                                                                                                                                                                                                                                                                                                                                                                                                                                                                        |
| Article Type:                 | Original research                                                                                                                                                                                                                                                                                                                                                                                                                                                                                                                                                                          |
| Date Submitted by the Author: | 13-Oct-2023                                                                                                                                                                                                                                                                                                                                                                                                                                                                                                                                                                                |
| Complete List of Authors:     | Granot, Yoav; affiliated to the Faculty of Medicine, Department of Cardiology; Icahn School of Medicine at Mount Sinai<br>Sapir, Orly Ran; Tel Aviv Sourasky Medical Center, Department of Cardiology; Mayo Clinic, Department of Cardiovascular Medicine<br>Laufer-Perl, Michal; Tel Aviv Sourasky Medical Center Cardiology Division<br>Viskin, Dana; Tel Aviv Sourasky Medical Center, Cardiology<br>Banai, Shmuel; Tel-Aviv Medical Centre, Department of Cardiology<br>Topilsky, Yan; Tel Aviv Sourasky Medical Center, Cardiology<br>Havakuk, Ofer; Tel Aviv Sourasky Medical Center |
| Keywords:                     | Heart failure < CARDIOLOGY, Adult cardiology < CARDIOLOGY, Echocardiography < CARDIOLOGY, Valvular heart disease < CARDIOLOGY                                                                                                                                                                                                                                                                                                                                                                                                                                                              |
|                               |                                                                                                                                                                                                                                                                                                                                                                                                                                                                                                                                                                                            |

SCHOLARONE™  
Manuscripts

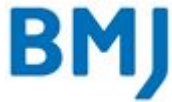

I, the Submitting Author has the right to grant and does grant on behalf of all authors of the Work (as defined in the below author licence), an exclusive licence and/or a non-exclusive licence for contributions from authors who are: i) UK Crown employees; ii) where BMJ has agreed a CC-BY licence shall apply, and/or iii) in accordance with the terms applicable for US Federal Government officers or employees acting as part of their official duties; on a worldwide, perpetual, irrevocable, royalty-free basis to BMJ Publishing Group Ltd ("BMJ") its licensees and where the relevant Journal is co-owned by BMJ to the co-owners of the Journal, to publish the Work in this journal and any other BMJ products and to exploit all rights, as set out in our [licence](#).

The Submitting Author accepts and understands that any supply made under these terms is made by BMJ to the Submitting Author unless you are acting as an employee on behalf of your employer or a postgraduate student of an affiliated institution which is paying any applicable article publishing charge ("APC") for Open Access articles. Where the Submitting Author wishes to make the Work available on an Open Access basis (and intends to pay the relevant APC), the terms of reuse of such Open Access shall be governed by a Creative Commons licence – details of these licences and which [Creative Commons](#) licence will apply to this Work are set out in our licence referred to above.

Other than as permitted in any relevant BMJ Author's Self Archiving Policies, I confirm this Work has not been accepted for publication elsewhere, is not being considered for publication elsewhere and does not duplicate material already published. I confirm all authors consent to publication of this Work and authorise the granting of this licence.

1  
2  
3 The Effect of Combined Non-Severe Aortic Stenosis and Mitral Regurgitation on Clinical  
4  
5  
6 Outcomes  
7  
8  
9

10 Yoav Granot, MD<sup>1 2</sup>, Orly Ran Sapir<sup>1 3</sup>, MD<sup>1</sup>, Michal Laufer Perl MD<sup>1</sup>, Dana Viskin MD<sup>1</sup>,  
11  
12 Shmuel Banai MD<sup>1</sup>, Yan Topilsky, MD<sup>1</sup> and Ofer Havakuk MD<sup>1</sup>  
13  
14

15  
16  
17 From <sup>1</sup> Department of Cardiology, Tel Aviv Medical Center, Tel Aviv, Israel, affiliated to the  
18  
19 Faculty of Medicine, Tel Aviv University, Tel Aviv, Israel  
20

21 <sup>2</sup> Zena and Michael A. Wiener Cardiovascular Institute, Icahn School of Medicine at Mount  
22  
23 Sinai, New York, NY, United States  
24  
25

26 <sup>3</sup> Division of preventive Cardiology, Department of Cardiovascular Medicine, Mayo Clinic  
27  
28  
29

30  
31 All authors take responsibility for all aspects of the reliability and freedom from bias of the data  
32  
33 presented and their discussed interpretation  
34  
35  
36  
37

38 **Funding:** This research did not receive any specific grant from funding agencies in the public,  
39  
40 commercial, or not-for-profit sectors.  
41

42 **Conflict of Interest:** none declared  
43  
44

45 **Word Count** - 2356  
46  
47  
48

49 Corresponding author: Yoav Granot, MD, Department of Cardiology, Tel Aviv Medical Center,  
50  
51 6 Weizmann Street. Tel Aviv 6423906, Israel. Email: yoavgran@gmail.com  
52  
53  
54  
55  
56  
57  
58  
59  
60

## Abstract

**Objectives:** Though the concomitant occurrence of non-severe aortic stenosis (AS) and mitral regurgitation (MR) is highly prevalent, there are limited data to guide clinical decision-making in this condition. Here, we attempt to determine cut-off values associated with worse clinical outcomes in patients with combined non-severe AS and MR

**Methods:** Included were consecutive patients who underwent echocardiography examination in 2010-2021 with evidence of combined non severe AS and MR. We excluded patients with  $\geq$ moderate aortic valve regurgitation or mitral stenosis, as well as patients who underwent any aortic or mitral intervention either prior or following our assessment (n=372).

**Results:** The final cohort consisted of 2933 patients with non-severe AS, 506 of them with >mild MR. Patient with both pathologies had lower cardiac output and worse diastolic function. Patients with an aortic valve area (AVA)  $\leq 1.35\text{cm}^2$  in the presence of >mild MR had the highest rates of HF hospitalizations (HR 3.1, IQR 2.4-4,  $P < 0.001$ ) or mortality (HR 2, IQR 1.8-2.4,  $P < 0.001$ ), that remained significant after adjusting for clinical and echocardiographic parameters.

**Conclusion:** Patients with combined non-severe AS and MR have a higher rate of HF hospitalizations and mortality. An AVA  $\leq 1.35\text{cm}^2$  in the presence of >mild MR is associated with worse clinical outcomes.

**Keywords:** Aortic stenosis, Mitral regurgitation, Heart failure, Mortality

### Key messages

**What is already known on this topic** – Current guidelines recommend intervention only when these valvular lesions are severe and limited data exist for the management of patients with combined non-severe AS and MR

**What this study adds** – In patients with combined non-severe AS and MR, an AVA between 1.0-1.35cm<sup>2</sup> in the presence of >mild MR is associated with worse clinical outcomes

**How this study might affect research, practice or policy** – We suggest an AVA cutoff value of 1.35cm<sup>2</sup> for further evaluation and careful consideration of early intervention

## Introduction

Multiple valvular heart disease (mVHD) is defined as the combination of stenotic or regurgitant lesions occurring in  $\geq 2$  cardiac valves [1]. The presence of mVHD may significantly affect the evaluation of each valvular lesion severity by affecting left ventricular filling pressures, preload and afterload. Moreover, mVHD was associated with worse outcomes. In the Euro Heart Survey (EHS), mVHD was observed in 20% of the patients with native VHD [2], whereas in a Swedish nationwide study, mVHD was present in 11% of patients, with high prevalence of combined aortic stenosis (AS) and mitral regurgitation (MR) [3]. Notably, definition and specific cutoff values for mVHD currently lack and are based on local practice or registries.

As the impact of combined non-severe mVHD has not been appropriately defined or evaluated, contemporary guideline documents [4-5] focus mainly on mVHD in which at least one of the lesions involved is defined as severe. Therefore, in this study, we chose to evaluate the presence and the impact of non-severe mVHD on patients' outcomes in a large tertiary center.

## Material and Methods

We used a retrospective analysis performed in a single university-affiliated large tertiary care hospital. The study was reviewed and approved by the Institutional Review Board with a waiver of informed consent.

### Study Population

Adult patients who underwent an echocardiography at our center between January 2010 and March 2021, with evidence of less than severe AS combined with less than severe MR were included in the initial cohort.

1  
2  
3 Patients with  $\geq$ moderate aortic valve regurgitation (AR) or  $\geq$ moderate mitral stenosis (MS) and  
4 those in whom an aortic or mitral valve intervention was done (n=372) were excluded from the  
5  
6 analysis.  
7  
8

### 9 10 Doppler Echocardiography

11  
12 To evaluate the presence of mVHD, all patients underwent a comprehensive two-dimensional  
13 and Doppler echocardiographic study with multiple windows during the same examination.  
14

15 Echocardiography was performed according to contemporary ESC guideline [6]. All  
16  
17 measurements were retrieved from the echocardiography reporting system.  
18  
19

20 Stroke volume was calculated as the product of left ventricular outflow tract (LVOT) area and  
21  
22 the time-velocity integral of the aortic flow velocity. Cardiac output (CO) measured as stroke  
23  
24 volume multiplied by heart rate.  
25  
26

27 Aortic valve area (AVA) was calculated using continuity equation from the flow through the  
28  
29 LVOT with respect to the flow through the aortic valve. Aortic valve velocities were obtained  
30  
31 from multiple windows for the highest obtained peak velocity and mean gradient. Severe AS was  
32  
33 defined as a peak velocity  $>4$ m/s, mean gradient  $>40$ mmHg or estimated AVA  $<1$ cm<sup>2</sup>.  
34  
35

36 MR severity was determined by an integrative, semi-quantitative and quantitative approach,  
37  
38 including assessment of vena contracta width, valve morphology, chamber size, jet area, jet  
39  
40 density and contour, and when available, effective orifice area (ERO) and regurgitant volume.  
41  
42

43 After excluding those defined as severe MR, we grouped those these patients into: MR $\leq$ mild and  
44  
45 MR $>$ mild.  
46  
47

48 Pulsed-wave Doppler was performed in the apical 4-chamber view to obtain mitral inflow  
49  
50 velocities to assess LV filling. A 1-mm to 3-mm sample volume was placed between the mitral  
51  
52 leaflet tips at end-expiration and during diastole after optimizing spectral gain, wall filter  
53  
54  
55  
56  
57  
58  
59  
60



1  
2  
3 settings, and setting sweep speeds of 100 mm/s. Recordings were averaged over 3 consecutive  
4 cardiac cycles during sinus rhythm and over 5 cycles during atrial fibrillation (AF).  
5

6  
7 Measurements of mitral inflow included the peak early filling (E wave) and late diastolic filling  
8 (A wave) velocities, the E/A ratio, and deceleration time (DT) of early filling velocity. Early  
9 diastolic mitral annular velocities (e') was measured in the apical 4-chamber view. The e' was  
10 measured from septal and lateral annulus. The ratio of peak E to peak e' was calculated (mitral  
11 E/e' ratio) from the average of at least 3 cardiac cycles. Left atrium volume was calculated by  
12 tracing the endocardial borders at end-systole in the apical four-and two-chamber views, with LA  
13 volume index calculated by adjusting to the patient's body surface index (BSA).  
14

15  
16 Systolic pulmonary arterial pressure (sPAP) was determined by the maximal tricuspid  
17 regurgitant velocity (calculated based on the simplified Bernoulli equation) and an estimation of  
18 right atrial pressure according to the vena cava width and responsiveness.  
19

20  
21 LV diameters including left ventricle end systolic and diastolic diameter (LVESd, LVEDd) were  
22 measured using lineal 2D echocardiography or M-mode parallel to the mitral valve annulus.  
23

24  
25 Right ventricular (RV) size and function assessment was based on multiple views of the RV. An  
26 integrative qualitative grading of RV function was formulated by a specialized imaging  
27 cardiologist responsible for the echocardiographic study.  
28  
29

### 30 31 32 33 34 35 36 37 38 39 40 41 42 43 44 Clinical data and outcome measures

45  
46 Baseline characteristics including age, sex and major co-morbidities were extracted from the  
47 electronic health record (EMR). Hospitalization for heart failure (HF) at our medical center were  
48 retrieved from the electronic health record. The date of mortality (if occurred) was automatically  
49 updated in the hospital records via the Ministry of Health.  
50  
51  
52  
53  
54  
55  
56  
57  
58  
59  
60

### Statistical Analysis

Categorical variables are reported as numbers and percentages, and continuous variables are reported as means and standard deviations or medians and interquartile ranges (IQRs), as appropriate. Continuous variables were tested for normal distribution using histograms, Q-Q Plots and normality tests (Kolmogorov-Smirnov and Shapiro-Wilk). Continuous variables were compared between groups using independent Mann-Whitney test, post-hoc Bonferroni correction applied to analyze subgroup comparison. Categorical variables were compared using Chi-square test or Fisher's exact test, post-hoc Bonferroni correction applied to analyze subgroup comparison.

The AVA was divided into categories by means of a classification and regression model (CART) for the prediction of HF hospitalization, with a minimum of 100 cases in parent node and minimum of 50 cases in child node. The analysis selects the best predictor for splitting the data into child nodes. A P value is given for each branch.

Long-term outcome (all-cause mortality or HF hospitalization) assessed using a Cox regression model, also adjusted for clinical and echocardiographic parameters. The following variables were included:

Clinical variables: Age, sex, chronic renal failure (CRF), hypertension, ischemic heart disease (IHD), AF, HF, chronic obstructive pulmonary disease (COPD).

Echocardiographic variables: ejection fraction (EF), LVEDd, LVESd, degree of AR, RV function and RV size. Of note, due to the expected effect of mVHD on LV filling indices and forward flow (stroke volume), as the major hemodynamic consequences leading to HF hospitalization, these parameters we evaluated in the COX regression model separately.

1  
2  
3 All statistical tests were two-sided, and a P-value of < .05 was considered statistically significant.  
4  
5 SPSS software was used for all statistical analysis (IBM SPSS statistics, version 25, Armonk,  
6  
7  
8 NY, USA, 2017).  
9  
10  
11  
12

## 13 **Results**

### 14 Patient Clinical Characteristics

15  
16  
17 The study cohort included 2933 patients with non-severe AS. Of whom, 2427 had  $\leq$ mild MR and  
18  
19 506 >mild MR. Table 1 provides the patients' clinical characteristics.  
20  
21

22 The median follow-up time of the entire cohort was 1127 days (IQR 392-1999), during which  
23  
24 1572 patients (53.6%) had died and 435 patients (14.8%) had experienced a HF hospitalization.  
25  
26 Compared with patients with  $\leq$ mild MR, patient with >mild MR were older (80.1 years, IQR  
27  
28 72.4-86.2 vs 83.2 years, IQR 76.3-88.6,  $P < 0.001$ ), with a predominance female population  
29  
30 (45.8% vs 53%,  $P = 0.03$ ) respectively.  
31  
32

33 In addition, patients with >mild MR were more likely to have a history of AF (36.8% versus  
34  
35 22.4%,  $P < 0.001$ ), CRF (21.7% versus 12.9,  $P < 0.001$ ), hypertension (71.3% versus 62.5%,  $P <$   
36  
37 0.001) and IHD (45.5% versus 37.1%,  $P < 0.001$ ).  
38  
39

40 Examining outcomes, patient with >mild MR experienced a higher rate of HF hospitalizations  
41  
42 (23.9% versus 12.9%,  $P < 0.001$ ) and increased all-cause mortality (66.2% versus 53.6%,  
43  
44  $P < 0.001$ ).  
45  
46

### 47 Patient echocardiographic measurements

48  
49 Patients' echocardiographic measurements in the entire cohort and according to severity of MR  
50  
51 are presented in table 2.  
52  
53  
54  
55  
56  
57  
58  
59  
60

1  
2  
3 Patients with >mild MR had slightly lower cardiac output values (5.03ml/m<sup>2</sup>, IQR 4.29-6.18  
4 versus 5.64 (IQR 4.78-6.61, P < 0.001) and a greater left ventricle end-systolic (31mm, IQR 26-  
5 38, versus 28, IQR 25-33, P < 0.001) and end-diastolic diameters (49mm, IQR 45-54 versus 47,  
6 IQR 43-51, P < 0.001).  
7  
8  
9

10  
11  
12 Proximal isovelocity hemispheric surface area (PISA) data were available only in a portion of  
13 patients with >mild MR. These patients had an ERO area of 0.1cm<sup>2</sup> (IQR 0.1-0.2, n=184/514)  
14 with a regurgitant volume of 26ml (IQR 17-35ml, n=105/330).  
15  
16  
17

18  
19 As expected, patients with >mild MR had an overall worse diastolic indices with a larger LA  
20 volume index, shorter deceleration time, higher E/A ratio and elevated SPAP compared with  
21 patient with ≤mild MR. The average e' for the entire cohort was mildly reduced (6, IQR 4.93-  
22 7.21), with no difference between MR severity groups.  
23  
24  
25  
26  
27

28 Higher rates of RV dysfunction and RV dilatation were found in patients with >mild MR (Table  
29 2).  
30  
31  
32

### 33 **Aortic valve area optimal cutoff value**

34  
35 In patients with >mild MR, a classification tree analysis revealed a cutoff value of 1.35cm<sup>2</sup> to be  
36 predictive for HF hospitalizations. Accordingly, we further divided both MR groups according to  
37 the suggested AS cutoff value. Patients' clinical and echocardiographic measurements in these 4  
38 sub-groups are presented in table 3.  
39  
40  
41  
42  
43  
44  
45  
46

### 47 Hemodynamic impact of AVA in patient with >mild MR

48  
49 Among patients with >mild MR, those with AVA ≤ 1.35cm<sup>2</sup> were older compared with patients  
50 with AVA > 1.35cm<sup>2</sup> (84.4 years, IQR 77.5-89.2 vs 81.2 years, IQR 73.6-87.3 respectively, P =  
51  
52  
53  
54  
55  
56  
57  
58  
59  
60

0.002). There were no other statistically significant differences in baseline clinical characteristics between these two sub-groups.

Patient with  $AVA \leq 1.35 \text{ cm}^2$  had lower CO compared with patients with an  $AVA > 1.35 \text{ cm}^2$  (4.77 l/min, IQR 4.03-5.7 vs 5.93 l/min, IQR 4.85-6.62 respectively,  $P < 0.001$ ) and had elevated sPAP values (49mmHg, IQR 39-59 compared with 42mmHg, IQR 34-54  $p < 0.001$ ), whereas other diastolic or RV function indices did not significantly differ between the two groups (Table 3).

#### Effect of AVA and MR severity on clinical outcomes

The impact of MR grade and AVA on HF hospitalizations within each subgroup is presented in table 4.

In univariate Cox regression analysis (Figure 1), patients with  $>$ mild MR and an  $AVA \leq 1.35 \text{ cm}^2$  had the highest rate of HF hospitalizations compared with patients  $\leq$ mild MR and an  $AVA > 1.35 \text{ cm}^2$  (HR 3.1, IQR 2.4-4,  $P < 0.001$ ).

AVA had more impact on patients' outcomes, since the presence of significant MR in patients with an  $AVA > 1.35 \text{ cm}^2$  was associated with increased rates of HF hospitalizations in univariate analysis (group 1 versus group 3, HR 1.6, IQR 1.1-2.3,  $P = 0.007$ ), this effect was lost after adjusting for echocardiographic parameters and/or clinical parameters. Furthermore, following adjustment for either clinical comorbidities or echocardiographic parameters only patients with a combination of  $>$ mild MR and  $AVA \leq 1.35 \text{ cm}^2$  had a higher HF hospitalizations rate.

Analysis concerning all-cause mortality is available in Table S1 and Figure 1S. Patients with  $>$ mild MR and  $AVA \leq 1.35 \text{ cm}^2$  had higher mortality rates compared with patients with  $\leq$ mild MR and  $AVA > 1.35 \text{ cm}^2$ , even after adjusting for clinical and/or echocardiographic parameters

1  
2  
3 The effect of diastolic function on outcome is presented in table 4 and the effect of surgical AV  
4 replacement on outcomes is presented in tables S2,S3 and figure S2.  
5  
6  
7  
8  
9  
10

## 11 12 **Discussion**

13  
14 This study sought to describe the clinical outcomes of patients with combined non-severe AS and  
15 low-grade MR. Our major findings are:  
16  
17

- 18 - These patients have lower CO with worse diastolic function.
- 19 - AVA between 1.0-1.35cm<sup>2</sup> in the presence of >mild MR is associated with worse clinical  
20 outcomes even after adjusting for clinical and/or echocardiographic parameters.
- 21 - In contrast, patients with an AVA>1.35cm<sup>2</sup> have similar clinical outcomes regardless of  
22 (non-severe) MR grade.  
23  
24  
25  
26  
27  
28  
29

30 AS and MR are the most prevalent valvular heart diseases in high-income countries [7].

31 However, unless the patient is planned for an aortic or coronary surgery, current guidelines

32 recommend intervention only when these valvular lesions are severe [4-5] and limited

33 recommendations exist for the management of patients with combined non-severe AS and MR.

34 The hemodynamic effects of AS result from chronic increased afterload that leads to LV

35 hypertrophy, diastolic dysfunction and increased systolic intra-ventricular pressures. MR, on the

36 other hand, reduces afterload, SV and CO, but increases preload. The net effect of both lesions

37 will reduce the net forward flow with augmentation of diastolic pressures [8-9], a finding

38 compatible with our results.  
39

40 Recent data show that compared with no or mild AS, moderate AS was found to be associated

41 with increased mortality risk [10-11]. A recent meta-analysis by Coisne et al. [12] showed that  
42  
43  
44  
45  
46  
47  
48  
49  
50  
51  
52  
53  
54  
55  
56  
57  
58  
59  
60

1  
2  
3 the rate difference of all-cause mortality was -3.9 (95% CI: -6.7 to -1.1) for no or mild AS  
4 compared with moderate AS. An additional retrospective analysis of 148 patients with moderate  
5 AS [13] studied predictors of poor clinical outcomes (composite of CV death, HF admission and  
6 AV replacement), and showed that  $\geq$ moderate MR, as well as lower range AVA was associated  
7 with worse outcomes. A study by Tastet et al. [14] retrospectively analyzed 735 patient with at  
8 least moderate aortic stenosis ( $AVA < 1.5\text{cm}^2$ ) followed in the heart valve clinics of four high-  
9 volume centers. The patients were classified according to degree of cardiac structural  
10 abnormalities; with stage 2 classified as either LA enlargement or  $>$ mild MR (9 patients in total),  
11 both shown to predict higher all-cause mortality rates. A follow-up study by Amanullah et al [15]  
12 showed that stage 2 patients ( $\sim 20\%$  of them with significant MR) had worse clinical outcomes  
13 including increased all-cause mortality and HF events. Finally, Benfari et al. [16] showed that in  
14 patients with trans-aortic velocity  $> 2.5\text{m/s}$  and  $AVA > 1\text{cm}^2$ , an MR ERO area  $> 0.1\text{cm}^2$  was  
15 associated with a higher rates of HF hospitalizations or death.  
16  
17  
18  
19  
20  
21  
22  
23  
24  
25  
26  
27  
28  
29  
30  
31  
32

33 In clinical practice, it is challenging to determine the optimal timing for valvular correction of  
34 mVHD. Our data, encompassing almost 3,000 patients with comprehensive echocardiographic  
35 evaluation and valid clinical outcomes, suggest that patients with combined  $>$ mild MR and  
36  $AVA \leq 1.35\text{cm}^2$  have worse clinical outcomes and as such could benefit from close follow-up  
37 visits and frequent serial evaluation by a multidisciplinary heart valve team. It remains to be  
38 seen, however, whether early interventions could improve the clinical outcome of these patients.  
39  
40  
41  
42  
43  
44  
45  
46  
47  
48

49 Several important limitations should be addressed. First, this is a single-center retrospective  
50 study; thus, prospective data are needed to further establish its findings. Second, due to relatively  
51 small number of patient with combined non-severe AS and MR we did not divide our cohort into  
52  
53  
54  
55  
56  
57  
58  
59  
60

1  
2  
3 a learning and validation groups, consequently reducing the internal validity of the study. Last,  
4  
5 as we excluded patient with other left sided valvular abnormalities, the current finding should not  
6  
7 be applied to other mVHD.  
8  
9

10 In conclusion, combined low grade AS with MR is associated with adverse outcomes. We  
11  
12 suggest an AVA cutoff value of 1.35cm<sup>2</sup> for further evaluation and careful consideration of early  
13  
14 intervention.  
15  
16  
17  
18  
19  
20  
21  
22  
23  
24  
25  
26  
27  
28  
29  
30  
31  
32  
33  
34  
35  
36  
37  
38  
39  
40  
41  
42  
43  
44  
45  
46  
47  
48  
49  
50  
51  
52  
53  
54  
55  
56  
57  
58  
59  
60



## References

1. DOI: 10.1161/CIRCIMAGING.118.007862. Unger P, Pibarot P, Tribouilloy C, Lancellotti P, Maisano F, Iung B, Piérard L; European Society of Cardiology Council on Valvular Heart Disease. Multiple and Mixed Valvular Heart Diseases. *Circ Cardiovasc Imaging*. 2018 Aug;11(8)
2. DOI: 10.1016/s0195-668x(03)00201-x. Iung B, Baron G, Butchart EG, Delahaye F, Gohlke-Bärwolf C, Levang OW, Tornos P, Vanoverschelde JL, Vermeer F, Boersma E, Ravaud P, Vahanian A. A prospective survey of patients with valvular heart disease in Europe: The Euro Heart Survey on Valvular Heart Disease. *Eur Heart J*. 2003 Jul;24(13):1231-43.
3. DOI: 10.1136/heartjnl-2016-310894. Andell P, Li X, Martinsson A, Andersson C, Stagmo M, Zöller B, Sundquist K, Smith JG. Epidemiology of valvular heart disease in a Swedish nationwide hospital-based register study. *Heart*. 2017; 103:1696–1703.
4. DOI: 10.1161/CIR.0000000000000932. Otto CM, Nishimura RA, Bonow RO, Carabello BA, Erwin JP 3rd, Gentile F, Jneid H, Krieger EV, Mack M, McLeod C, O'Gara PT, Rigolin VH, Sundt TM 3rd, Thompson A, Toly C. 2020 ACC/AHA Guideline for the Management of Patients With Valvular Heart Disease: Executive Summary: A Report of the American College of Cardiology/American Heart Association Joint Committee on Clinical Practice Guidelines. *Circulation*. 2021 Feb 2;143(5):e35-e71.
5. DOI: 10.1093/eurheartj/ehab395. Vahanian A, Beyersdorf F, Praz F, Milojevic M, Baldus S, Bauersachs J, Capodanno D, Conradi L, De Bonis M, De Paulis R, Delgado V, Freemantle N, Gilard M, Haugaa KH, Jeppsson A, Jüni P, Pierard L, Prendergast BD, Sádaba JR, Tribouilloy C, Wojakowski W; ESC/EACTS Scientific Document Group.

- 2021 ESC/EACTS Guidelines for the management of valvular heart disease. *Eur Heart J*. 2022 Feb 12;43(7):561-632.
6. DOI: 10.1016/j.echo.2005.10.005. Lang RM, Bierig M, Devereux RB, Flachskampf FA, Foster E, Pellikka PA, Picard MH, Roman MJ, Seward J, Shanewise JS, Solomon SD, Spencer KT, Sutton MS, Stewart WJ; Chamber Quantification Writing Group; American Society of Echocardiography's Guidelines and Standards Committee; European Association of Echocardiography. Recommendations for chamber quantification: a report from the American Society of Echocardiography's Guidelines and Standards Committee and the Chamber Quantification Writing Group, developed in conjunction with the European Association of Echocardiography, a branch of the European Society of Cardiology. *J Am Soc Echocardiogr*. 2005 Dec;18(12):1440-63.
7. DOI: 10.3390/medsci10020032. Aluru JS, Barsouk A, Saginala K, Rawla P, Barsouk A. Valvular Heart Disease Epidemiology. *Med Sci (Basel)*. 2022 Jun 15;10(2):32.
8. DOI: 10.1016/j.ccl.2019.09.002. Unger P, Tribouilloy C. Aortic Stenosis with Other Concomitant Valvular Disease: Aortic Regurgitation, Mitral Regurgitation, Mitral Stenosis, or Tricuspid Regurgitation. *Cardiol Clin*. 2020 Feb;38(1):33-46.
9. DOI: 10.3389/fcvm.2021.744497. Mantovani F, Fanti D, Tafciu E, Fezzi S, Setti M, Rossi A, Ribichini F, Benfari G. When Aortic Stenosis Is Not Alone: Epidemiology, Pathophysiology, Diagnosis and Management in Mixed and Combined Valvular Disease. *Front Cardiovasc Med*. 2021 Oct 15;8:744497.
10. DOI: 10.1016/j.echo.2021.02.014. Mann TD, Loewenstein I, Ben Assa E, Topilsky Y. Natural History of Moderate Aortic Stenosis with Preserved and Low Ejection Fraction. *J Am Soc Echocardiogr*. 2021 Jul;34(7):735-743. Epub 2021 Feb 27. PMID: 33652083.

- 1  
2  
3 11. DOI: 10.1136/openhrt-2021-001743. Pankayatselvan V, Raber I, Playford D, Stewart S,  
4  
5 Strange G, Strom JB. Moderate aortic stenosis: culprit or bystander? *Open Heart*. 2022  
6  
7 Jan;9(1):e001743.  
8  
9
- 10 12. DOI: 10.1016/j.jcin.2022.06.022. Coisne A, Scotti A, Latib A, Montaigne D, Ho EC,  
11  
12 Ludwig S, Modine T, Généreux P, Bax JJ, Leon MB, Bauters C, Granada JF. Impact of  
13  
14 Moderate Aortic Stenosis on Long-Term Clinical Outcomes: A Systematic Review and  
15  
16 Meta-Analysis. *JACC Cardiovasc Interv*. 2022 Aug 22;15(16):1664-1674.  
17  
18
- 19 13. DOI: 10.1532/hsf.2971. Bae HJ, Hwang J, Han S, Hur SH, Chung JW, Kim H. Long  
20  
21 Term Clinical Outcomes in Patients with Moderate Aortic Stenosis. *Heart Surg Forum*.  
22  
23 2020 May 28;23(3):E358-E365.  
24  
25
- 26 14. DOI: 10.1016/j.jacc.2019.04.065. Tastet L, Tribouilloy C, Maréchaux S, Vollema EM,  
27  
28 Delgado V, Salaun E, Shen M, Capoulade R, Clavel MA, Arsenault M, Bédard É,  
29  
30 Bernier M, Beaudoin J, Narula J, Lancellotti P, Bax JJ, Généreux P, Pibarot P. Staging  
31  
32 Cardiac Damage in Patients With Asymptomatic Aortic Valve Stenosis. *J Am Coll*  
33  
34 *Cardiol*. 2019 Jul 30;74(4):550-563.  
35  
36
- 37 15. DOI: 10.1016/j.jcmg.2021.04.009. Amanullah MR, Pio SM, Ng ACT, Sin KYK, Marsan  
38  
39 NA, Ding ZP, Leon MB, Généreux P, Delgado V, Ewe SH, Bax JJ. Prognostic  
40  
41 Implications of Associated Cardiac Abnormalities Detected on Echocardiography in  
42  
43 Patients With Moderate Aortic Stenosis. *JACC Cardiovasc Imaging*. 2021  
44  
45 Sep;14(9):1724-1737.  
46  
47
- 48 16. DOI: 10.1016/j.amjcard.2020.09.016 γBenfari G, Setti M, Nistri S, Fanti D, Maffei C,  
49  
50 Tafciu E, Pighi M, Cicoira M, Ribichini FL, Rossi A. Relevance of Functional Mitral  
51  
52 Regurgitation in Aortic Valve Stenosis. *Am J Cardiol*. 2020 Dec 1;136:115-121.  
53  
54  
55  
56  
57  
58  
59  
60

**Table 1** | Patients' clinical Characteristics in the entire cohort and according to severity of mitral regurgitation

|                               | All patients<br>(n=2933)     | Patients with up to mild<br>MR (n=2427) | Patient with greater than<br>mild MR (n=506) | P value |
|-------------------------------|------------------------------|-----------------------------------------|----------------------------------------------|---------|
| Age (years) <sup>a</sup>      | 80.64 (73.16-86.7)           | 80.11 (72.42-86.24)                     | 83.15 (76.3-88.57)                           | <0.001  |
| Follow-up (days) <sup>a</sup> | 1127.54 (392.45-<br>1998.65) | 1227.27 (488.60-2100.26)                | 721.52 (150.39-1471.61)                      | <0.001  |
| Sex (Female)                  | 1379 (47)                    | 1111 (45.8)                             | 268 (53)                                     | 0.03    |
| Deceased during<br>Follow-up  | 1571 (53.6)                  | 1236 (50.9)                             | 335 (66.2)                                   | <0.001  |
| Heart Failure admission       | 435 (14.8)                   | 314 (12.9)                              | 121 (23.9)                                   | <0.001  |
| AF                            | 657 (22.4)                   | 471 (19.4)                              | 186 (36.8)                                   | <0.001  |
| CRF                           | 423 (14.4)                   | 313 (12.9)                              | 110 (21.7)                                   | <0.001  |
| Malignancy                    | 642 (21.9)                   | 528 (21.8)                              | 114 (22.5)                                   | 0.702   |
| Hypertension                  | 1877 (64)                    | 1516 (62.5)                             | 361 (71.3)                                   | <0.001  |
| DM                            | 965 (32.9)                   | 801 (33)                                | 164 (32.4)                                   | 0.796   |
| CVA/TIA                       | 379 (12.9)                   | 305 (12.6)                              | 74 (14.6)                                    | 0.209   |
| IHD                           | 1131 (38.6)                  | 901 (37.1)                              | 230 (45.5)                                   | <0.001  |
| COPD                          | 269 (9.2)                    | 223 (9.2)                               | 46 (9.1)                                     | 0.945   |

<sup>a</sup>Median and interquartile range. All other values represent the number of patients and percentages

AF – Atrial fibrillation; CRF – Chronic renal failure; DM – Diabetes mellitus; CVA – Cerebrovascular accident; TIA – transient ischemic attack; IHD – Ischemic heart disease; COPD – Chronic obstructive pulmonary disease

**Table 2 | Patients' echocardiographic measurements in the entire cohort and according to severity of mitral regurgitation**

|                                        |                      | All patients (n=2933) | Patients with up to mild MR (n=2427) | Patient with greater than mild MR (n=506) | P value |
|----------------------------------------|----------------------|-----------------------|--------------------------------------|-------------------------------------------|---------|
| Ejection Fraction a                    |                      | 60 (55-60)            | 60 (55-60)                           | 55 (45-60)                                | <0.001  |
| Cardiac output (liter/min) a           |                      | 5.56 (4.67-6.53)      | 5.64 (4.78-6.61)                     | 5.03 (4.29-6.18)                          | <0.001  |
| LVEDd (mm) a                           |                      | 47 (43-51)            | 47 (43-51)                           | 49 (45-54)                                | <0.001  |
| LVESd (mm) a                           |                      | 29 (25-34)            | 28 (25-33)                           | 31 (26-38)                                | <0.001  |
| Aortic valve area (cm <sup>2</sup> ) a |                      | 1.4 (1.2-1.6)         | 1.4 (1.2-1.7)                        | 1.3 (1.1-1.5)                             | <0.001  |
| Peak aortic gradient (mmHg) a          |                      | 26 (21-34)            | 27 (22-35)                           | 26 (21-33)                                | 0.045   |
| Mean aortic gradient (mmHg) a          |                      | 15 (12-20)            | 15 (12-20)                           | 15 (11-19)                                | 0.018   |
| LAVI (ml/m <sup>2</sup> ) a            |                      | 42.7 (33.5-53.5)      | 40.3 (32.2-50.8)                     | 53.1 (44-65.7)                            | <0.001  |
| Deceleration time (ms) a               |                      | 219 (174-274)         | 225 (180-275)                        | 187 (153-241)                             | <0.001  |
| E/e' a                                 |                      | 14.02 (10.97-18.34)   | 13.62 (10.54-17.7)                   | 17.05 (13.18-22.39)                       | <0.001  |
| Average e' a                           |                      | 6 (4.93-7.21)         | 6 (4.96-7.2)                         | 6 (4.73-7.35)                             | 0.452   |
| E/A ratio a                            |                      | 0.8 (0.7-1.1)         | 0.8 (0.6-1.1)                        | 1.1 (0.9-1.6)                             | <0.001  |
| sPAP (mmHg) a                          |                      | 36 (30-47)            | 34 (29-44)                           | 46 (37-58)                                | <0.001  |
| Aortic valve regurgitation             | None                 | 1485 (50.6)           | 1288 (53.1)                          | 197 (38.9)                                | <0.001  |
|                                        | minimal              | 577 (19.7)            | 478 (19.7)                           | 99 (19.6)                                 |         |
|                                        | mild                 | 685 (23.4)            | 532 (21.9)                           | 153 (30.2)                                |         |
|                                        | mild to moderate     | 186 (6.3)             | 129 (5.3)                            | 57 (11.3)                                 |         |
| Right Ventricle function               | Normal               | 2668 (91)             | 2264 (93.3)                          | 404 (79.8)                                | <0.001  |
|                                        | Mild dysfunction     | 207 (7.1)             | 131 (5.4)                            | 76 (15)                                   |         |
|                                        | Moderate dysfunction | 51 (1.7)              | 29 (1.2)                             | 22 (4.3)                                  |         |
|                                        | Severe dysfunction   | 7 (0.2)               | 3 (0.1)                              | 4 (0.8)                                   |         |
| Right Ventricle size                   | Normal               | 2593 (88.4)           | 2208 (91)                            | 385 (76.1)                                | <0.001  |
|                                        | Mild dilatation      | 257 (8.8)             | 165 (6.8)                            | 92 (18.2)                                 |         |
|                                        | Moderate dilatation  | 63 (2.1)              | 41 (1.7)                             | 22 (4.3)                                  |         |
|                                        | Severe dilatation    | 20 (0.7)              | 13 (0.5)                             | 7 (1.4)                                   |         |

<sup>a</sup>Median and interquartile range. All other values represent the number of patients and percentages

LVEDd – Left ventricle end diastolic diameter; LVESd – Left ventricle end systolic diameter; LAVI – Left atrial volume index; sPAP – Systolic pulmonary artery pressure;

**Table 3** | Patients' clinical and echocardiographic measurements according to MR severity and Aortic valve area of 1.35cm<sup>2</sup>

|                               | MR ≤ mild                   |                             |        | MR > Mild                   |                           |        |                |                |                 |
|-------------------------------|-----------------------------|-----------------------------|--------|-----------------------------|---------------------------|--------|----------------|----------------|-----------------|
|                               | AVA > 1.35                  | AVA ≤1.35                   |        | AVA > 1.35                  | AVA ≤1.35                 |        |                |                |                 |
|                               | Group 1<br>N=1333           | Group 2<br>N=1094           | P      | Group 3<br>N=211            | Group 4<br>N=295          | P      | P<br>Group 2-4 | P<br>Group 1-3 | P<br>All groups |
| Age (years) <sup>a</sup>      | 79.29<br>(70.70-85.62)      | 81.46<br>(74.49-86.71)      | <0.001 | 81.17<br>(73.62-87.38)      | 84.42<br>(77.51-89.21)    | 0.002  | <0.001         | 0.027          | <0.001          |
| Follow-up (days) <sup>a</sup> | 1392.46<br>(540.49-2178.28) | 1107.03<br>(431.58-1955.41) | 0.002  | 1005.51<br>(242.21-1750.63) | 573.56<br>(111.7-1249.36) | 0.003  | <0.001         | <0.001         | <0.001          |
| Sex (Female)                  | 527<br>(39.5)               | 584 (53.4)                  | <0.001 | 103<br>(48.8)               | 165<br>(55.9)             | NS     | NS             | NS             | <0.001          |
| Deceased during Follow-up     | 647<br>(48.4)               | 589 (53.8)                  | <0.001 | 124<br>(58.8)               | 211<br>(71.5)             | 0.017  | <0.001         | 0.035          | <0.001          |
| Heart Failure admission       | 176<br>(13.2)               | 138 (12.6)                  | NS     | 38 (18)                     | 83<br>(28.1)              | 0.024  | <0.001         | NS             | <0.001          |
| AF                            | 257<br>(19.3)               | 214 (19.6)                  | NS     | 78 (37)                     | 108<br>(36.6)             | NS     | 0.012          | <0.001         | <0.001          |
| CRF                           | 172<br>(12.9)               | 141 (12.9)                  | NS     | 51 (24.2)                   | 59 (20)                   | NS     | 0.012          | <0.001         | <0.001          |
| Malignancy                    | 295<br>(22.1)               | 233 (21.3)                  |        | 45 (21.3)                   | 69<br>(23.4)              |        |                |                | 0.874           |
| HTN                           | 853 (64)                    | 663 (60.6)                  | NS     | 145<br>(68.7)               | 216<br>(73.2)             | NS     | <0.001         | NS             | <0.001          |
| DM                            | 439<br>(32.9)               | 362 (33.1)                  |        | 70 (33.2)                   | 94<br>(31.9)              |        |                |                | 0.982           |
| GVA/TIA                       | 167<br>(12.5)               | 138 (12.6)                  |        | 26 (12.3)                   | 48<br>(16.3)              |        |                |                | 0.35            |
| HD                            | 512<br>(38.4)               | 389 (35.6)                  | NS     | 99 (46.9)                   | 131<br>(44.4)             | NS     | 0.032          | NS             | 0.002           |
| COPD                          | 139<br>(10.4)               | 84 (7.7)                    |        | 15 (7.1)                    | 31<br>(10.5)              |        |                |                | 0.067           |
| V EF <sup>a</sup>             | 60 (55-60)                  | 60 (55-60)                  | 1      | 60 (45-60)                  | 55 (45-60)                | 0.514  | <0.001         | 0.001          | <0.001          |
| Cardiac output (liter/min)    | 6.05<br>(5.13-7)            | 5.01 (4.3-5.93)             | <0.001 | 5.93<br>(4.85-6.62)         | 4.77<br>(4.03-5.7)        | <0.001 | 0.058          | 0.001          | <0.001          |
| LVEDd (mm) <sup>a</sup>       | 47 (43-51)                  | 46 (42-51)                  | 0.019  | 50 (46-55)                  | 48 (44-54)                | 0.18   | <0.001         | <0.001         | <0.001          |

1

2

|    |                                                   |                  |                     |               |        |                    |                     |        |        |        |        |
|----|---------------------------------------------------|------------------|---------------------|---------------|--------|--------------------|---------------------|--------|--------|--------|--------|
| 3  | LVESd (mm) <sup>a</sup>                           |                  | 29 (25-33)          | 28 (25-33)    | 0.334  | 31 (27-39)         | 31 (26-38)          | 1      | <0.001 | <0.001 | <0.001 |
| 4  | Aortic valve area (cm <sup>2</sup> ) <sup>a</sup> |                  | 1.6 (1.5-1.9)       | 1.2 (1.1-1.3) | <0.001 | 1.6 (1.4-1.8)      | 1.13 (1.08-1.26)    | <0.001 | 1      | 0.725  | <0.001 |
| 5  | Peak aortic gradient (mmHg) <sup>a</sup>          |                  | 24 (20-30)          | 31 (24-40)    | <0.001 | 23 (19-29)         | 29 (22-38)          | <0.001 | 0.001  | 0.491  | <0.001 |
| 6  | Mean aortic gradient (mmHg) <sup>a</sup>          |                  | 14 (11-17)          | 18 (14-24)    | <0.001 | 13 (11-16)         | 17 (13-21)          | <0.001 | <0.001 | 0.294  | <0.001 |
| 7  | E/A ratio <sup>a</sup>                            |                  | 13.23 (10.18-17.07) | 14 (11-18.16) | 0.001  | 16.3 (12.56-21.95) | 17.58 (14.03-22.64) | 0.425  | <0.001 | <0.001 | <0.001 |
| 8  | Average e' <sup>a</sup>                           |                  | 6.2 (5.1-7.4)       | 5.8 (4.7-7)   | <0.001 | 6 (4.7-7.5)        | 6 (4.7-7.2)         | 1      | 1      | 1      | <0.001 |
| 9  | E/A ratio <sup>a</sup>                            |                  | 0.8 (0.7-1.1)       | 0.8 (0.6-1.1) | 1      | 1.1 (0.8-1.5)      | 1.2 (0.9-1.7)       | 0.451  | <0.001 | <0.001 | <0.001 |
| 10 | PAP (mmHg) <sup>a</sup>                           |                  | 34 (28-43)          | 35 (29-45)    | 0.089  | 42 (34-54)         | 49 (39-59)          | <0.001 | <0.001 | <0.001 | <0.001 |
| 11 | MR ERO (cm <sup>2</sup> ) <sup>a</sup>            |                  | NA                  | NA            |        | 0.1 (0.1-0.2)      | 0.1 (0.1-0.2)       | 0.148  |        |        |        |
| 12 | MR Rvol (ml) <sup>a</sup>                         |                  | NA                  | NA            |        | 25 (17-35)         | 26 (17-34)          | 0.893  |        |        |        |
| 13 | AR                                                | None             | 739 (55.4)          | 549 (50.2)    | NS     | 82 (38.9)          | 115 (39)            | NS     | 0.005  | <0.001 | <0.001 |
| 14 |                                                   | minimal          | 253 (19)            | 225 (20.6)    |        | 30 (14.2)          | 69 (23.4)           |        |        |        |        |
| 15 |                                                   | mild             | 266 (20)            | 266 (24.3)    |        | 72 (34.1)          | 81 (27.5)           |        |        |        |        |
| 16 |                                                   | mild to moderate | 75 (5.6)            | 54 (4.9)      |        | 27 (12.8)          | 30 (10.2)           |        |        |        |        |
| 17 | RV function                                       | Normal           | 1245 (93.4)         | 1019 (93.1)   | NS     | 173 (82)           | 231 (78.3)          | NS     | <0.001 | <0.001 | <0.001 |
| 18 |                                                   | Mild             | 72 (5.4)            | 59 (5.4)      |        | 31 (14.7)          | 45 (15.3)           |        |        |        |        |
| 19 |                                                   | Moderate         | 15 (1.1)            | 14 (1.3)      |        | 6 (2.8)            | 16 (5.4)            |        |        |        |        |
| 20 |                                                   | Severe           | 1 (0.1)             | 2 (0.2)       |        | 1 (0.5)            | 3 (1)               |        |        |        |        |
| 21 | RV size                                           | Normal           | 1221 (91.6)         | 987 (90.2)    | NS     | 167 (79.1)         | 218 (73.9)          | NS     | <0.001 | <0.001 | <0.001 |

56

57

58

59

60

1  
2

|   |          |          |          |  |           |          |  |  |  |  |
|---|----------|----------|----------|--|-----------|----------|--|--|--|--|
| 3 | Mild     | 83 (6.2) | 82 (7.5) |  | 33 (15.6) | 59 (20)  |  |  |  |  |
| 4 | Moderate | 24 (1.8) | 17 (1.6) |  | 9 (4.3)   | 13 (4.4) |  |  |  |  |
| 5 | Severe   | 5 (0.4)  | 8 (0.7)  |  | 2 (0.9)   | 5 (1.7)  |  |  |  |  |

7

8

9

10

11

12

13

14

15

16

17

18

19

20

21

22

23

24

25

26

27

28

29

30

31

32

33

34

35

36

37

38

39

40

41

42

43

44

45

46

47

48

49

50

51

52

53

54

55

56

57

58

59

60

<sup>a</sup>Median and interquartile range. All other values represent the number of patients and percentages

AF – Atrial fibrillation; CRF – Chronic renal failure; DM – Diabetes mellitus; CVA – Cerebrovascular accident; TIA – transient ischemic attack; IHD – Ischemic heart disease; COPD – Chronic obstructive pulmonary disease; LVEDd – Left ventricle end diastolic diameter; LVESd – Left ventricle end systolic diameter; LAVI – Left atrial volume index; sPAP – Systolic pulmonary artery pressure; MR – Mitral Regurgitation; RV – Right Ventricle; AR – Aortic regurgitation; LV EF – Left ventricle ejection fraction



**Table 4 | Impact of MR grade and Aortic valve area on heart failure hospitalization**

|                                                                                                           | HR    | 95% CI      | P      |
|-----------------------------------------------------------------------------------------------------------|-------|-------------|--------|
| Up to mild MR +<br>AVA $\leq$ 1.35cm <sup>2</sup> versus AVA > 1.35cm <sup>2</sup>                        |       |             |        |
| Univariate analysis                                                                                       | 1.036 | 0.829-1.295 | 0.754  |
| Greater than mild MR +<br>AVA $\leq$ 1.35cm <sup>2</sup> versus AVA > 1.35cm <sup>2</sup>                 |       |             |        |
| Univariate                                                                                                | 1.893 | 1.288-2.781 | 0.001  |
| Adjusted for all clinical*                                                                                | 1.941 | 1.309-2.880 | <0.001 |
| Adjusted for all echocardiographic†                                                                       | 1.672 | 1.097-2.548 | 0.017  |
| Adjusted for both *†                                                                                      | 1.774 | 1.157-2.72  | 0.009  |
| Adjusted for Diastolic parameter # + Cardiac output                                                       | 1.555 | 0.833-2.904 | 0.166  |
| AVA > 1.35cm <sup>2</sup> +<br>MR up to mild versus greater than mild                                     |       |             |        |
| Univariate analysis                                                                                       | 1.624 | 1.143-2.308 | 0.007  |
| Adjusted for all clinical*                                                                                | 1.249 | 0.873-1.788 | 0.223  |
| Adjusted for all echocardiographic†                                                                       | 0.992 | 0.652-1.508 | 0.969  |
| Adjusted for both *†                                                                                      | 0.881 | 0.572-1.358 | 0.567  |
| Adjusted for Diastolic parameter # + Cardiac output                                                       | 0.645 | 0.356-1.168 | 0.148  |
| AVA $\leq$ 1.35cm <sup>2</sup> +<br>MR greater than mild versus up to mild                                |       |             |        |
| Univariate analysis                                                                                       | 3.056 | 2.324-4.018 | <0.001 |
| Adjusted for all clinical*                                                                                | 2.241 | 1.689-2.973 | <0.001 |
| Adjusted for all echocardiographic†                                                                       | 2.162 | 1.545-3.025 | <0.001 |
| Adjusted for both *†                                                                                      | 1.625 | 1.163-2.271 | 0.004  |
| Adjusted for Diastolic parameter # + Cardiac output                                                       | 1.816 | 1.135-2.906 | 0.013  |
| Greater than mild MR + AVA $\leq$ 1.35cm <sup>2</sup> versus<br>Up to mild MR + AVA > 1.35cm <sup>2</sup> |       |             |        |
| Univariate analysis                                                                                       | 3.089 | 2.374-4.019 | <0.001 |
| Adjusted for all clinical*                                                                                | 2.164 | 1.641-2.852 | <0.001 |
| Adjusted for all echocardiographic†                                                                       | 1.67  | 1.205-2.314 | 0.002  |
| Adjusted for both *†                                                                                      | 1.296 | 0.941-1.784 | 0.112  |
| Adjusted for Diastolic parameter # + Cardiac output                                                       | 1.175 | 0.708-1.948 | 0.533  |

1  
2  
3  
4 \* For clinical variables – Age, Sex, Atrial fibrillation, chronic renal failure Hypertension, Ischemic  
5 heart disease, COPD

6  
7 † For Echocardiographic variables – Ejection fraction, Left ventricle end diastolic diameter, Left  
8 ventricle end systolic diameter, Aortic valve regurgitation grade, right ventricle size, right  
9 ventricle function

10 # For Diastolic parameter – LAVI, DT, Average E/e', E/A ratio, sPAP  
11  
12  
13  
14  
15  
16  
17  
18  
19  
20  
21  
22  
23  
24  
25  
26  
27  
28  
29  
30  
31  
32  
33  
34  
35  
36  
37  
38  
39  
40  
41  
42  
43  
44  
45  
46  
47  
48  
49  
50  
51  
52  
53  
54  
55  
56  
57  
58  
59  
60

**Table S1 | Impact of MR grade and Aortic valve area on mortality**

|                                                                                                           | HR    | 95% CI      | P      |
|-----------------------------------------------------------------------------------------------------------|-------|-------------|--------|
| Up to mild MR +<br>AVA $\leq$ 1.35cm <sup>2</sup> versus AVA > 1.35cm <sup>2</sup>                        |       |             |        |
| Univariate                                                                                                | 1.223 | 1.094-1.368 | <0.001 |
| Adjusted for all clinical*                                                                                | 1.15  | 1.027-1.288 | 0.015  |
| Adjusted for all echocardiographic†                                                                       | 1.168 | 1.032-1.321 | 0.014  |
| Adjusted for both *†                                                                                      | 1.116 | 0.984-1.266 | 0.087  |
| Adjusted for Diastolic parameter # + Cardiac output                                                       | 0.985 | 0.815-1.191 | 0.878  |
| Greater than mild MR +<br>AVA $\leq$ 1.35cm <sup>2</sup> versus AVA > 1.35cm <sup>2</sup>                 |       |             |        |
| Univariate                                                                                                | 1.426 | 1.142-1.78  | 0.002  |
| Adjusted for all clinical*                                                                                | 1.324 | 1.053-1.664 | 0.016  |
| Adjusted for all echocardiographic†                                                                       | 1.242 | 0.969       | 1.592  |
| Adjusted for both *†                                                                                      | 1.23  | 0.954-1.586 | 0.11   |
| Adjusted for Diastolic parameter # + Cardiac output                                                       | 1.176 | 0.818-1.689 | 0.382  |
| AVA > 1.35cm <sup>2</sup> +<br>MR up to mild versus greater than mild                                     |       |             |        |
| Univariate analysis                                                                                       | 1.431 | 1.181-1.735 | <0.001 |
| Adjusted for all clinical*                                                                                | 1.22  | 1.003-1.484 | 0.046  |
| Adjusted for all echocardiographic†                                                                       | 1.317 | 1.057-1.639 | 0.014  |
| Adjusted for both *†                                                                                      | 1.191 | 0.95-1.493  | 0.129  |
| Adjusted for Diastolic parameter # + Cardiac output                                                       | 1     | 0.74-1.353  | 0.998  |
| AVA $\leq$ 1.35cm <sup>2</sup> +<br>MR up to mild versus greater than mild                                |       |             |        |
| Univariate analysis                                                                                       | 1.684 | 1.438-1.972 | <0.001 |
| Adjusted for all clinical*                                                                                | 1.388 | 1.18-1.632  | <0.001 |
| Adjusted for all echocardiographic†                                                                       | 1.409 | 1.167-1.701 | <0.001 |
| Adjusted for both *†                                                                                      | 1.196 | 0.99-1.444  | 0.064  |
| Adjusted for Diastolic parameter # + Cardiac output                                                       | 1.055 | 0.798-1.395 | 0.706  |
| Greater than mild MR + AVA $\leq$ 1.35cm <sup>2</sup> versus<br>Up to mild MR + AVA > 1.35cm <sup>2</sup> |       |             |        |
| Univariate analysis                                                                                       | 2.049 | 1.753-2.396 | <0.001 |

|                                                     |       |             |        |
|-----------------------------------------------------|-------|-------------|--------|
| Adjusted for all clinical*                          | 1.543 | 1.312-1.815 | <0.001 |
| Adjusted for all echocardiographic†                 | 1.737 | 1.446-2.086 | <0.001 |
| Adjusted for both *†                                | 1.377 | 1.144-1.657 | <0.001 |
| Adjusted for Diastolic parameter # + Cardiac output | 1.127 | 0.84-1.513  | 0.425  |

\* For clinical variables – Age, Sex, Atrial fibrillation, chronic renal failure Hypertension, Ischemic heart disease, COPD

† For Echocardiographic variables – Ejection fraction, Left ventricle end diastolic diameter, Left ventricle end systolic diameter, Aortic valve regurgitation grade, right ventricle size, right ventricle function

# For Diastolic parameter – LAVI, DT, Average E/e', E/A ratio, sPAP

**Table S2** | Patients' clinical and echocardiographic measurements according to Intervention (Surgical AVR) in patient with MR>mild and AVA $\leq$ 1.35cm<sup>2</sup>

|                                                   | MR > mild + AVA $\leq$ 1.35cm <sup>2</sup> |                     |        |
|---------------------------------------------------|--------------------------------------------|---------------------|--------|
|                                                   | No intervention (n=295)                    | SAVR (n=10)         | P      |
| Age (years) <sup>a</sup>                          | 84.42 (77.51-89.21)                        | 65.77 (63.3-68.93)  | <0.001 |
| Sex (Female)                                      | 165 (55.9)                                 | 5 (50)              | 0.71   |
| Deceased during Follow-up                         | 211 (71.5)                                 | 4 (40)              | 0.032  |
| Heart Failure admission                           | 83 (28.1)                                  | 1 (10)              | 0.207  |
| AF                                                | 108 (36.6)                                 | 5 (50)              | 0.389  |
| CRF                                               | 59 (20)                                    | 2 (20)              | 1      |
| Malignancy                                        | 69 (23.4)                                  | 0                   | 0.082  |
| HTN                                               | 216 (73.2)                                 | 7 (70)              | 0.821  |
| DM                                                | 94 (31.9)                                  | 5 (50)              | 0.228  |
| QVA/TIA                                           | 48 (16.3)                                  | 0                   | 0.165  |
| PHD                                               | 131 (44.4)                                 | 6 (60)              | 0.33   |
| COPD                                              | 31 (10.5)                                  | 0                   | 0.279  |
| LVEF <sup>a</sup>                                 | 55 (45-60)                                 | 60 (45-60)          | 0.485  |
| Cardiac output (liter/min)                        | 4.77 (4.03-5.7)                            | 5.42 (4.45-7)       | 0.174  |
| LVEDd (mm) <sup>a</sup>                           | 48 (44-54)                                 | 51 (49-57)          | 0.097  |
| LVESd (mm) <sup>a</sup>                           | 31 (26-38)                                 | 31 (28-37)          | 0.888  |
| Aortic valve area (cm <sup>2</sup> ) <sup>a</sup> | 1.13 (1.08-1.26)                           | 1.15 (1.1-1.2)      | 0.775  |
| Peak aortic gradient (mmHg) <sup>a</sup>          | 29 (22-38)                                 | 39 (37-45)          | 0.01   |
| Mean aortic gradient (mmHg) <sup>a</sup>          | 17 (13-21)                                 | 23 (18-28)          | 0.009  |
| AVI (ml/m <sup>2</sup> ) <sup>a</sup>             | 52.1 (44.2-65)                             | 47.5 (46.8-48.4)    | 0.442  |
| Deceleration time (ms) <sup>a</sup>               | 180 (148-229)                              | 197 (173-235)       | 0.327  |
| E/e' <sup>a</sup>                                 | 17.58 (14.03-22.64)                        | 19.37 (17.92-23.93) | 0.092  |

1  
2

|    |                          |                  |               |             |       |
|----|--------------------------|------------------|---------------|-------------|-------|
| 3  | E/A ratio <sup>a</sup>   |                  | 1.2 (0.9-1.7) | 1.2 (1-2.9) | 0.6   |
| 4  |                          |                  |               |             |       |
| 5  | sPAP (mmHg) <sup>a</sup> |                  | 49 (39-59)    | 40 (38-50)  | 0.107 |
| 6  |                          |                  |               |             |       |
| 7  | AR                       | None             | 115 (39)      | 3 (30)      | 0.762 |
| 8  |                          | minimal          | 69 (23.4)     | 2 (20)      |       |
| 9  |                          | mild             | 81 (27.5)     | 3 (30)      |       |
| 10 |                          | mild to moderate | 30 (10.2)     | 2 (20)      |       |
| 11 |                          |                  |               |             |       |
| 12 |                          |                  |               |             |       |
| 13 | RV function              | Normal           | 231 (78.3)    | 10 (100)    | 0.433 |
| 14 |                          | Mild             | 45 (15.3)     | 0           |       |
| 15 |                          | Moderate         | 16 (5.4)      | 0           |       |
| 16 |                          | Severe           | 3 (1)         | 0           |       |
| 17 |                          |                  |               |             |       |
| 18 |                          |                  |               |             |       |
| 19 | RV size                  | Normal           | 218 (73.9)    | 10 (100)    | 0.322 |
| 20 |                          | Mild             | 59 (20)       | 0           |       |
| 21 |                          | Moderate         | 13 (4.4)      | 0           |       |
| 22 |                          | Severe           | 5 (1.7)       | 0           |       |
| 23 |                          |                  |               |             |       |
| 24 |                          |                  |               |             |       |

25

26

27

28

29

30

31

32

33

34

35

36

37

38

39

40

41

42

43

44

45

46

47

48

49

50

51

52

53

54

55

56

57

58

59

60

<sup>a</sup>Median and interquartile range. All other values represent the number of patients and percentages

AF – Atrial fibrillation; CRF – Chronic renal failure; DM – Diabetes mellitus; CVA – Cerebrovascular accident; TIA – transient ischemic attack; IHD – Ischemic heart disease; COPD – Chronic obstructive pulmonary disease; LVEDd – Left ventricle end diastolic diameter; LVESd – Left ventricle end systolic diameter; LAVI – Left atrial volume index; sPAP – Systolic pulmonary artery pressure; MR - Mitral Regurgitation; RV – Righth Ventricle; AR – Aortic regurgitation; LV EF – Left ventricle ejection fraction

**Table S3** | Impact of Intervention (Surgical AVR) in patient with MR>mild and AVA $\leq$ 1.35cm<sup>2</sup>

| HF hospitalization  | HR    | 95% CI      | P     |
|---------------------|-------|-------------|-------|
| Univariate          | 0.21  | 0.029-1.513 | 0.121 |
| Adjusted *          | 0.372 | 0.048-2.895 | 0.345 |
| All-Cause Mortality |       |             |       |
| Univariate          | 0.286 | 0.106-0.774 | 0.014 |
| Adjusted *          | 0.508 | 0.177-1.461 | 0.209 |

\* For Age, Left ventricle end diastolic diameter, Aortic valve Peak and mean gradient, Average E/e' ratio

**Figure legend:**

For peer review only

1  
2  
3 Figure 1 – Univariate Cox regression analysis for HF hospitalization according to severity of MR  
4 and AVA  
5  
6

7 Figure S1 – Univariate Cox regression analysis for mortality according to severity of MR and  
8 AVA  
9  
10

11 Figure S2 – Univariate Cox regression analysis for the Impact of Intervention (Surgical AVR) in  
12 patient with MR>mild and AVA $\leq$ 1.35cm<sup>2</sup>  
13  
14  
15  
16  
17  
18  
19  
20  
21  
22  
23  
24  
25  
26  
27  
28  
29  
30  
31  
32  
33  
34  
35  
36  
37  
38  
39  
40  
41  
42  
43  
44  
45  
46  
47  
48  
49  
50  
51  
52  
53  
54  
55  
56  
57  
58  
59  
60



Figure 1

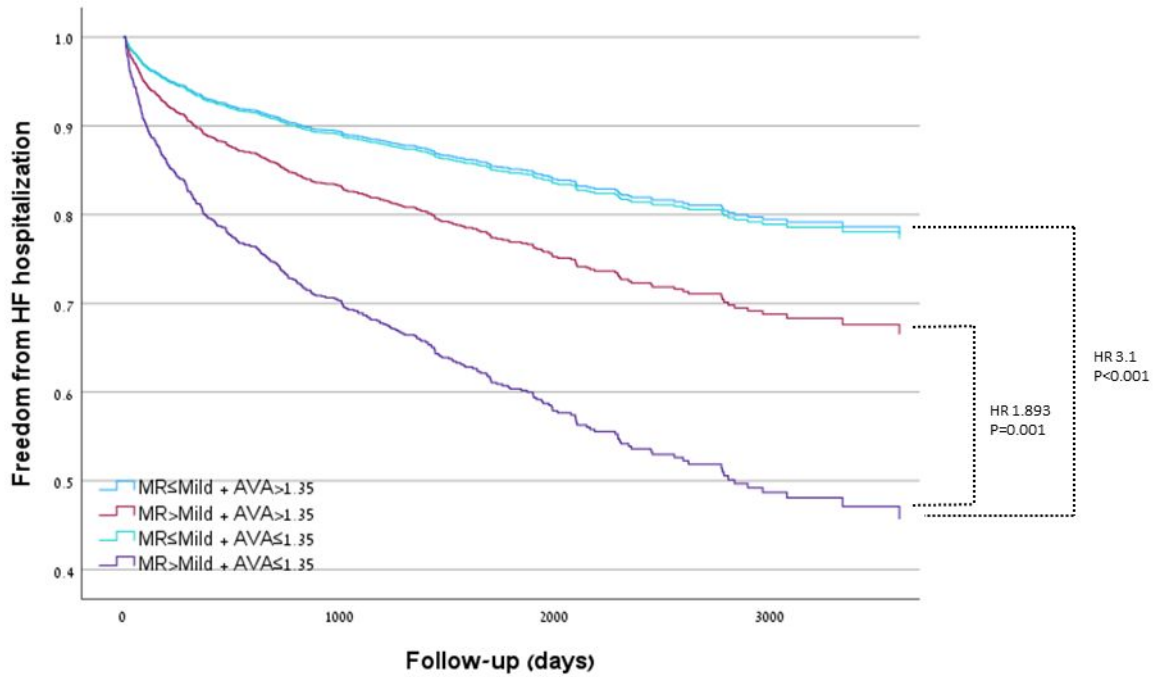

Figure S1

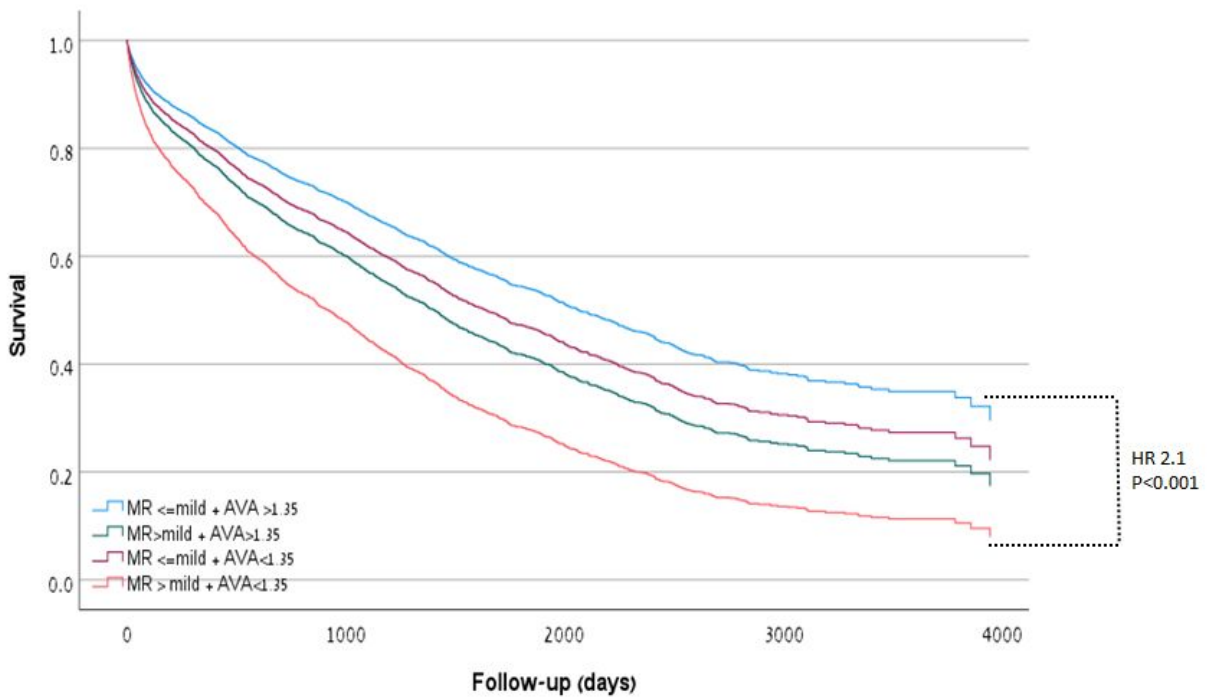

Figure S2

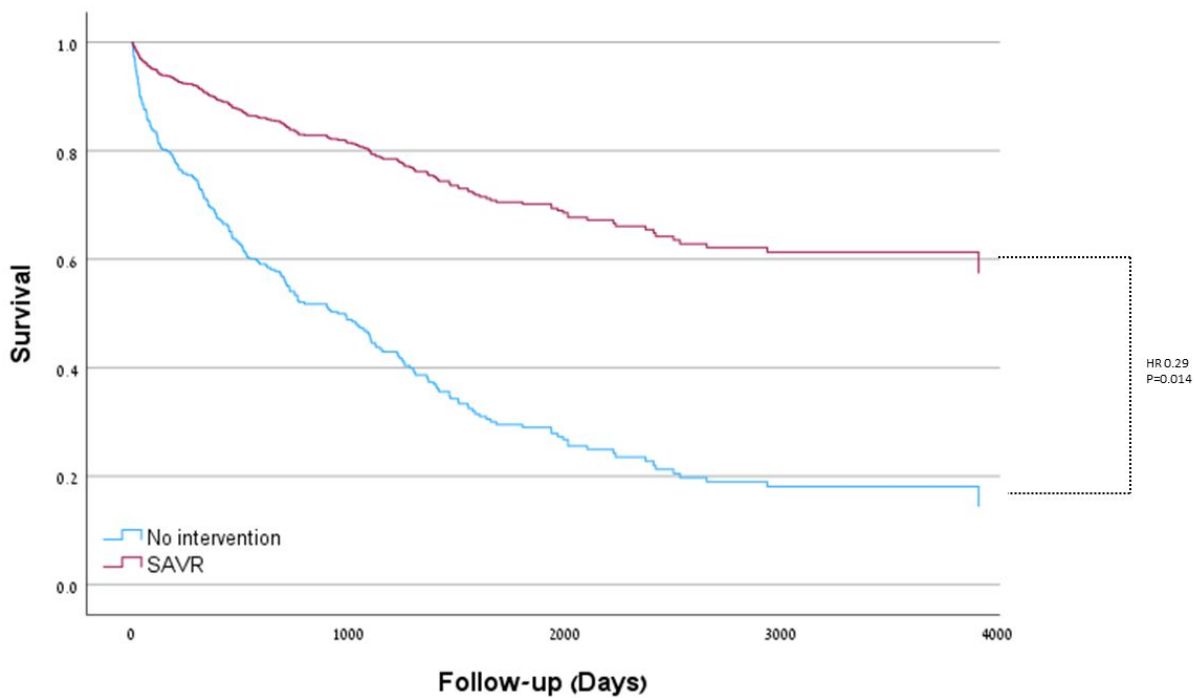

1  
2  
3  
4 Data Availability Statement  
5

6 The data that support the findings of this study are available from the corresponding author  
7 upon reasonable request.  
8  
9

10  
11  
12  
13 Consent  
14

15 The study was reviewed and approved by the Institutional Review Board with a waiver of  
16 informed consent. Approval number – TLV-0111-18  
17  
18  
19

20  
21  
22 Patient and Public Involvement  
23

24 Patients or the public were not involved in the design, or conduct, or reporting, or  
25 dissemination plans of our research  
26  
27  
28  
29  
30  
31  
32  
33  
34  
35  
36  
37  
38  
39  
40  
41  
42  
43  
44  
45  
46  
47  
48  
49  
50  
51  
52  
53  
54  
55  
56  
57  
58  
59  
60

1  
2  
3  
4  
5  
6  
7  
8  
9  
10  
11  
12  
13  
14  
15  
16  
17  
18  
19  
20  
21  
22  
23  
24  
25  
26  
27  
28  
29  
30  
31  
32  
33  
34  
35  
36  
37  
38  
39  
40  
41  
42  
43  
44  
45  
46  
47  
48  
49  
50  
51  
52  
53  
54  
55  
56  
57  
58  
59  
60

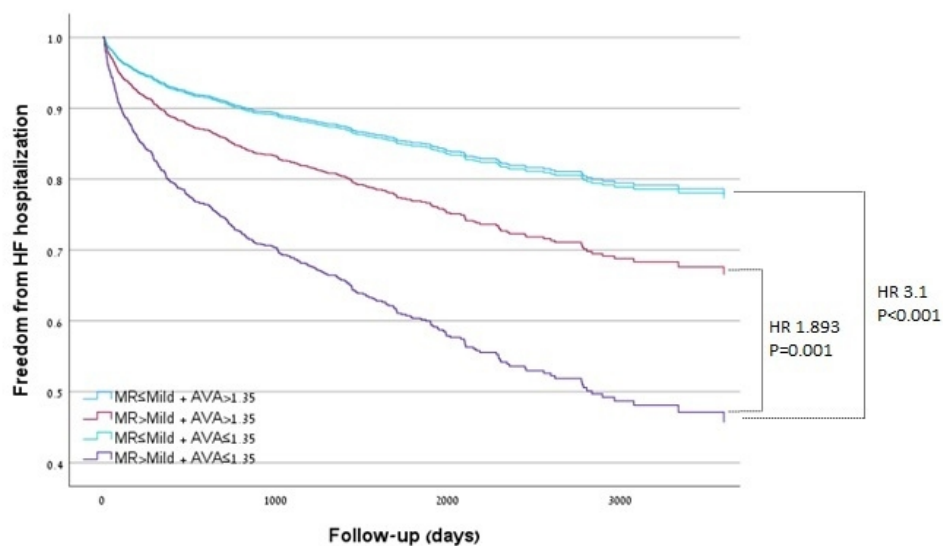

180x106mm (96 x 96 DPI)

1  
2  
3  
4  
5  
6  
7  
8  
9  
10  
11  
12  
13  
14  
15  
16  
17  
18  
19  
20  
21  
22  
23  
24  
25  
26  
27  
28  
29  
30  
31  
32  
33  
34  
35  
36  
37  
38  
39  
40  
41  
42  
43  
44  
45  
46  
47  
48  
49  
50  
51  
52  
53  
54  
55  
56  
57  
58  
59  
60

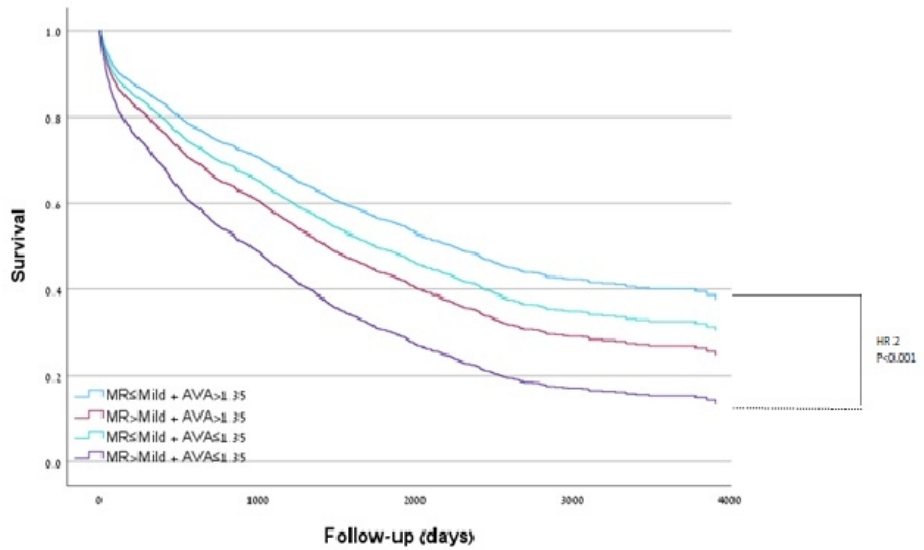

179x125mm (96 x 96 DPI)

1  
2  
3  
4  
5  
6  
7  
8  
9  
10  
11  
12  
13  
14  
15  
16  
17  
18  
19  
20  
21  
22  
23  
24  
25  
26  
27  
28  
29  
30  
31  
32  
33  
34  
35  
36  
37  
38  
39  
40  
41  
42  
43  
44  
45  
46  
47  
48  
49  
50  
51  
52  
53  
54  
55  
56  
57  
58  
59  
60

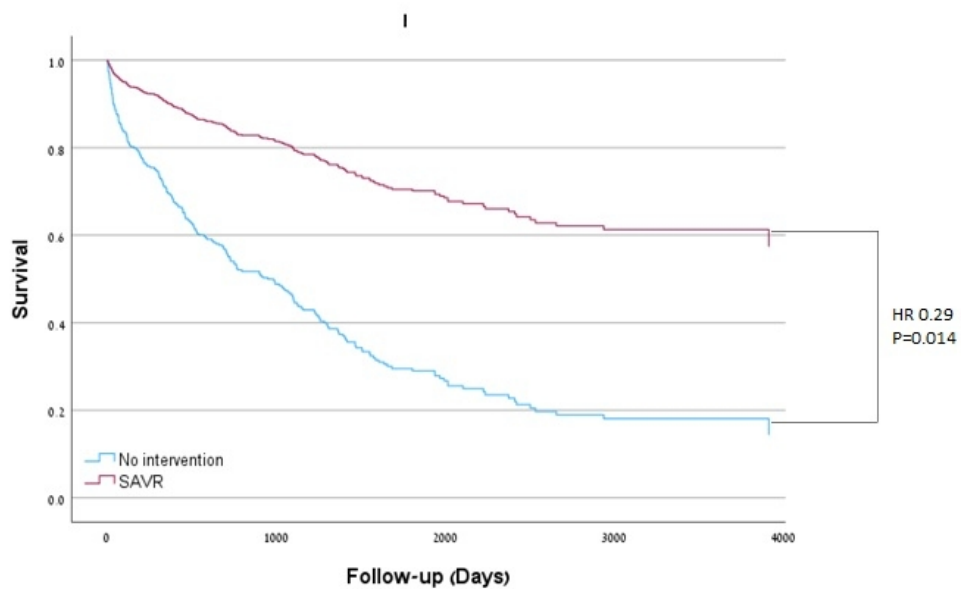

179x125mm (96 x 96 DPI)

STROBE Statement—Checklist of items that should be included in reports of *cohort studies*

|                              | Item No | Recommendation                                                                                                                                                                                                                                                                                                         | Page No |
|------------------------------|---------|------------------------------------------------------------------------------------------------------------------------------------------------------------------------------------------------------------------------------------------------------------------------------------------------------------------------|---------|
| <b>Title and abstract</b>    | 1       | (a) Indicate the study's design with a commonly used term in the title or the abstract<br>(b) Provide in the abstract an informative and balanced summary of what was done and what was found                                                                                                                          | 2       |
| <b>Introduction</b>          |         |                                                                                                                                                                                                                                                                                                                        |         |
| Background/rationale         | 2       | Explain the scientific background and rationale for the investigation being reported                                                                                                                                                                                                                                   | 4       |
| Objectives                   | 3       | State specific objectives, including any prespecified hypotheses                                                                                                                                                                                                                                                       | 4       |
| <b>Methods</b>               |         |                                                                                                                                                                                                                                                                                                                        |         |
| Study design                 | 4       | Present key elements of study design early in the paper                                                                                                                                                                                                                                                                | 4       |
| Setting                      | 5       | Describe the setting, locations, and relevant dates, including periods of recruitment, exposure, follow-up, and data collection                                                                                                                                                                                        | 4       |
| Participants                 | 6       | (a) Give the eligibility criteria, and the sources and methods of selection of participants. Describe methods of follow-up<br>(b) For matched studies, give matching criteria and number of exposed and unexposed                                                                                                      | 5       |
| Variables                    | 7       | Clearly define all outcomes, exposures, predictors, potential confounders, and effect modifiers. Give diagnostic criteria, if applicable                                                                                                                                                                               | 5-6     |
| Data sources/<br>measurement | 8*      | For each variable of interest, give sources of data and details of methods of assessment (measurement). Describe comparability of assessment methods if there is more than one group                                                                                                                                   | 5-6     |
| Bias                         | 9       | Describe any efforts to address potential sources of bias                                                                                                                                                                                                                                                              | 5-6     |
| Study size                   | 10      | Explain how the study size was arrived at                                                                                                                                                                                                                                                                              | 5-6     |
| Quantitative variables       | 11      | Explain how quantitative variables were handled in the analyses. If applicable, describe which groupings were chosen and why                                                                                                                                                                                           | 7       |
| Statistical methods          | 12      | (a) Describe all statistical methods, including those used to control for confounding<br>(b) Describe any methods used to examine subgroups and interactions<br>(c) Explain how missing data were addressed<br>(d) If applicable, explain how loss to follow-up was addressed<br>(e) Describe any sensitivity analyses | 7       |
| <b>Results</b>               |         |                                                                                                                                                                                                                                                                                                                        |         |
| Participants                 | 13*     | (a) Report numbers of individuals at each stage of study—eg numbers potentially eligible, examined for eligibility, confirmed eligible, included in the study, completing follow-up, and analysed<br>(b) Give reasons for non-participation at each stage<br>(c) Consider use of a flow diagram                        | 8       |
| Descriptive data             | 14*     | (a) Give characteristics of study participants (eg demographic, clinical, social) and information on exposures and potential confounders<br>(b) Indicate number of participants with missing data for each variable of interest<br>(c) Summarise follow-up time (eg, average and total amount)                         | 8       |
| Outcome data                 | 15*     | Report numbers of outcome events or summary measures over time                                                                                                                                                                                                                                                         | 8       |

|    |                          |    |                                                                                                                                                                                                              |       |
|----|--------------------------|----|--------------------------------------------------------------------------------------------------------------------------------------------------------------------------------------------------------------|-------|
| 1  | Main results             | 16 | (a) Give unadjusted estimates and, if applicable, confounder-adjusted estimates and their precision (eg, 95% confidence interval). Make clear which confounders were adjusted for and why they were included | 9-10  |
| 2  |                          |    | (b) Report category boundaries when continuous variables were categorized                                                                                                                                    |       |
| 3  |                          |    | (c) If relevant, consider translating estimates of relative risk into absolute risk for a meaningful time period                                                                                             |       |
| 4  |                          |    |                                                                                                                                                                                                              |       |
| 5  |                          |    |                                                                                                                                                                                                              |       |
| 6  |                          |    |                                                                                                                                                                                                              |       |
| 7  |                          |    |                                                                                                                                                                                                              |       |
| 8  |                          |    |                                                                                                                                                                                                              |       |
| 9  | Other analyses           | 17 | Report other analyses done—eg analyses of subgroups and interactions, and sensitivity analyses                                                                                                               | 9-10  |
| 10 |                          |    |                                                                                                                                                                                                              |       |
| 11 | <b>Discussion</b>        |    |                                                                                                                                                                                                              |       |
| 12 |                          |    |                                                                                                                                                                                                              |       |
| 13 | Key results              | 18 | Summarise key results with reference to study objectives                                                                                                                                                     | 11    |
| 14 | Limitations              | 19 | Discuss limitations of the study, taking into account sources of potential bias or imprecision. Discuss both direction and magnitude of any potential bias                                                   | 12-13 |
| 15 |                          |    |                                                                                                                                                                                                              |       |
| 16 | Interpretation           | 20 | Give a cautious overall interpretation of results considering objectives, limitations, multiplicity of analyses, results from similar studies, and other relevant evidence                                   | 13    |
| 17 |                          |    |                                                                                                                                                                                                              |       |
| 18 |                          |    |                                                                                                                                                                                                              |       |
| 19 | Generalisability         | 21 | Discuss the generalisability (external validity) of the study results                                                                                                                                        | 13    |
| 20 |                          |    |                                                                                                                                                                                                              |       |
| 21 | <b>Other information</b> |    |                                                                                                                                                                                                              |       |
| 22 | Funding                  | 22 | Give the source of funding and the role of the funders for the present study and, if applicable, for the original study on which the present article is based                                                | 1     |
| 23 |                          |    |                                                                                                                                                                                                              |       |
| 24 |                          |    |                                                                                                                                                                                                              |       |

\*Give information separately for exposed and unexposed groups.

**Note:** An Explanation and Elaboration article discusses each checklist item and gives methodological background and published examples of transparent reporting. The STROBE checklist is best used in conjunction with this article (freely available on the Web sites of PLoS Medicine at <http://www.plosmedicine.org/>, Annals of Internal Medicine at <http://www.annals.org/>, and Epidemiology at <http://www.epidem.com/>). Information on the STROBE Initiative is available at <http://www.strobe-statement.org>.



# BMJ Open

## Prognostic Impact of Combined Non-severe Aortic Stenosis and Mitral Regurgitation on Clinical Outcomes: A Single-Center Retrospective Study

|                                 |                                                                                                                                                                                                                                                                                                                                                                                                                                                                                                                                                                          |
|---------------------------------|--------------------------------------------------------------------------------------------------------------------------------------------------------------------------------------------------------------------------------------------------------------------------------------------------------------------------------------------------------------------------------------------------------------------------------------------------------------------------------------------------------------------------------------------------------------------------|
| Journal:                        | <i>BMJ Open</i>                                                                                                                                                                                                                                                                                                                                                                                                                                                                                                                                                          |
| Manuscript ID                   | bmjopen-2023-080914.R1                                                                                                                                                                                                                                                                                                                                                                                                                                                                                                                                                   |
| Article Type:                   | Original research                                                                                                                                                                                                                                                                                                                                                                                                                                                                                                                                                        |
| Date Submitted by the Author:   | 28-Feb-2024                                                                                                                                                                                                                                                                                                                                                                                                                                                                                                                                                              |
| Complete List of Authors:       | Granot, Yoav; affiliated to the Faculty of Medicine, Department of Cardiology; Icahn School of Medicine at Mount Sinai Sapir, Orly Ran; Tel Aviv Sourasky Medical Center, Department of Cardiology; Mayo Clinic, Department of Cardiovascular Medicine Laufer-Perl, Michal; Tel Aviv Sourasky Medical Center Cardiology Division Viskin, Dana; Tel Aviv Sourasky Medical Center, Cardiology Banai, Shmuel; Tel-Aviv Medical Centre, Department of Cardiology Topilsky, Yan; Tel Aviv Sourasky Medical Center, Cardiology Havakuk, Ofer; Tel Aviv Sourasky Medical Center |
| <b>Primary Subject Heading</b>: | Cardiovascular medicine                                                                                                                                                                                                                                                                                                                                                                                                                                                                                                                                                  |
| Secondary Subject Heading:      | Cardiovascular medicine                                                                                                                                                                                                                                                                                                                                                                                                                                                                                                                                                  |
| Keywords:                       | Heart failure < CARDIOLOGY, Adult cardiology < CARDIOLOGY, Echocardiography < CARDIOLOGY, Valvular heart disease < CARDIOLOGY                                                                                                                                                                                                                                                                                                                                                                                                                                            |
|                                 |                                                                                                                                                                                                                                                                                                                                                                                                                                                                                                                                                                          |

SCHOLARONE™  
Manuscripts



I, the Submitting Author has the right to grant and does grant on behalf of all authors of the Work (as defined in the below author licence), an exclusive licence and/or a non-exclusive licence for contributions from authors who are: i) UK Crown employees; ii) where BMJ has agreed a CC-BY licence shall apply, and/or iii) in accordance with the terms applicable for US Federal Government officers or employees acting as part of their official duties; on a worldwide, perpetual, irrevocable, royalty-free basis to BMJ Publishing Group Ltd ("BMJ") its licensees and where the relevant Journal is co-owned by BMJ to the co-owners of the Journal, to publish the Work in this journal and any other BMJ products and to exploit all rights, as set out in our [licence](#).

The Submitting Author accepts and understands that any supply made under these terms is made by BMJ to the Submitting Author unless you are acting as an employee on behalf of your employer or a postgraduate student of an affiliated institution which is paying any applicable article publishing charge ("APC") for Open Access articles. Where the Submitting Author wishes to make the Work available on an Open Access basis (and intends to pay the relevant APC), the terms of reuse of such Open Access shall be governed by a Creative Commons licence – details of these licences and which [Creative Commons](#) licence will apply to this Work are set out in our licence referred to above.

Other than as permitted in any relevant BMJ Author's Self Archiving Policies, I confirm this Work has not been accepted for publication elsewhere, is not being considered for publication elsewhere and does not duplicate material already published. I confirm all authors consent to publication of this Work and authorise the granting of this licence.

1  
2  
3 **Prognostic Impact of Combined Non-severe Aortic Stenosis and Mitral Regurgitation on**  
4  
5 **Clinical Outcomes: A Single-Center Retrospective Study**  
6  
7  
8  
9

10 Yoav Granot, MD<sup>1 2</sup>, Orly Ran Sapir<sup>1 3</sup>, MD<sup>1</sup>, Michal Laufer Perl MD<sup>1</sup>, Dana Viskin MD<sup>1</sup>,  
11  
12 Shmuel Banai MD<sup>1</sup>, Yan Topilsky, MD<sup>1</sup> and Ofer Havakuk MD<sup>1</sup>  
13  
14

15  
16  
17 From <sup>1</sup> Department of Cardiology, Tel Aviv Medical Center, Tel Aviv, Israel, affiliated to the  
18  
19 Faculty of Medicine, Tel Aviv University, Tel Aviv, Israel  
20

21 <sup>2</sup> Zena and Michael A. Wiener Cardiovascular Institute, Icahn School of Medicine at Mount  
22  
23 Sinai, New York, NY, United States  
24  
25

26 <sup>3</sup> Division of preventive Cardiology, Department of Cardiovascular Medicine, Mayo Clinic  
27  
28  
29

30  
31 All authors take responsibility for all aspects of the reliability and freedom from bias of the data  
32  
33 presented and their discussed interpretation  
34  
35  
36  
37

38 **Funding:** This research did not receive any specific grant from funding agencies in the public,  
39  
40 commercial, or not-for-profit sectors.  
41

42 **Conflict of Interest:** none declared  
43  
44

45 **Word Count** - 2396  
46  
47  
48

49 Corresponding author: Yoav Granot, MD, Department of Cardiology, Tel Aviv Medical Center,  
50  
51 6 Weizmann Street. Tel Aviv 6423906, Israel. Email: yoavgran@gmail.com  
52  
53  
54  
55  
56  
57  
58  
59  
60

## Abstract

**Objectives:** Though the concomitant occurrence of non-severe aortic stenosis (AS) and mitral regurgitation (MR) is highly prevalent, there are limited data to guide clinical decision-making in this condition. Here, we attempt to determine an aortic valve area (AVA) cut-off value associated with worse clinical outcomes in patients with combined non-severe AS and MR

**Methods:** Single center, retrospective analysis of consecutive patients who underwent echocardiography examination between 2010-2021 with evidence of combined non severe AS and MR. We excluded patients with  $\geq$ moderate aortic valve regurgitation or mitral stenosis, as well as patients who underwent any aortic or mitral intervention either prior or following our assessment (n=372).

**Results:** The final cohort consisted of 2933 patients with non-severe AS, 506 of them with >mild MR. Patient with both pathologies had lower cardiac output and worse diastolic function. Patients with an aortic valve area (AVA)  $\leq 1.35\text{cm}^2$  in the presence of >mild MR had the highest rates of HF hospitalizations (HR 3.1, IQR 2.4-4,  $P < 0.001$ ) or mortality (HR 2, IQR 1.8-2.4,  $P < 0.001$ ), that remained significant after adjusting for clinical and echocardiographic parameters.

**Conclusion:** Patients with combined non-severe AS and MR have a higher rate of HF hospitalizations and mortality. An AVA  $\leq 1.35\text{cm}^2$  in the presence of >mild MR is associated with worse clinical outcomes.

**Keywords:** Aortic stenosis, Mitral regurgitation, Heart failure, Mortality

### Strengths and limitations of this study

- Single center retrospective analysis of patients who underwent echocardiography examination between 2010-2021 which demonstrated combined non severe AS and MR
- Patients with other significant left sided valvular abnormalities and those in whom an aortic or mitral valve intervention was done were excluded from the analysis.
- CART modeling was used to identify the optimal aortic valve area (AVA) cutoff value predictive of heart failure hospitalization or all-cause mortality
- Further studies are warranted to validate this cutoff value.”

## Introduction

Multiple valvular heart disease (mVHD) is defined as the combination of stenotic or regurgitant lesions occurring in  $\geq 2$  cardiac valves [1]. The presence of mVHD may significantly affect the evaluation of each valvular lesion severity by affecting left ventricular filling pressures, preload and afterload. Moreover, mVHD was associated with worse outcomes. In the Euro Heart Survey (EHS), mVHD was observed in 20% of the patients with native VHD [2], whereas in a Swedish nationwide study, mVHD was present in 11% of patients, with high prevalence of combined aortic stenosis (AS) and mitral regurgitation (MR) [3]. Notably, definition and specific cutoff values for mVHD currently lack and are based on local practice or registries.

As the impact of combined non-severe mVHD has not been appropriately defined or evaluated, contemporary guideline documents [4-5] focus mainly on mVHD in which at least one of the lesions involved is defined as severe. Therefore, in this study, we chose to evaluate the presence and the impact of non-severe mVHD on patients' outcomes in a large tertiary center and seek an AVA cutoff value associated with worse clinical outcomes.

## Material and Methods

We used a retrospective analysis performed in a single university-affiliated large tertiary care hospital. The study was reviewed and approved by the Institutional Review Board with a waiver of informed consent.

### Study Population

Adult patients who underwent an echocardiography at our center between January 2010 and March 2021, with evidence of less than severe AS combined with less than severe MR were included in the initial cohort.

1  
2  
3 Patients with  $\geq$ moderate aortic valve regurgitation (AR) or  $\geq$ moderate mitral stenosis (MS) and  
4 those in whom an aortic or mitral valve intervention was done (n=372) were excluded from the  
5  
6 analysis.  
7  
8

### 9 10 Doppler Echocardiography

11  
12 To evaluate the presence of mVHD, all patients underwent a comprehensive two-dimensional  
13 and Doppler echocardiographic study with multiple windows during the same examination.  
14

15 Echocardiography was performed according to contemporary ESC guideline [6]. All  
16  
17 measurements were retrieved from the echocardiography reporting system.  
18  
19

20 Stroke volume was calculated as the product of left ventricular outflow tract (LVOT) area and  
21  
22 the time-velocity integral of the aortic flow velocity. Cardiac output (CO) measured as stroke  
23  
24 volume multiplied by heart rate.  
25  
26

27 Aortic valve area (AVA) was calculated using continuity equation from the flow through the  
28  
29 LVOT with respect to the flow through the aortic valve. Multiple windows were used for the  
30  
31 highest velocity. Severe AS was defined as a peak velocity  $>4$ m/s, mean gradient  $>40$ mmHg or  
32  
33 estimated AVA  $<1$ cm<sup>2</sup>. Both classical low flow-low gradient and paradoxical low-flow low  
34  
35 gradient aortic stenosis were not included in the current study.  
36  
37

38 MR severity was determined by an integrative, semi-quantitative and quantitative approach,  
39  
40 including assessment of vena contracta width, valve morphology, chamber size, jet area, jet  
41  
42 density and contour, and when available, effective orifice area (ERO) and regurgitant volume.  
43  
44

45 After excluding those defined as severe MR, we grouped those these patients into: MR  $\leq$ mild and  
46  
47 MR  $>$ mild.  
48  
49

50 Measurements of mitral inflow included the peak early filling (E wave) and late diastolic filling  
51  
52 (A wave) velocities, the E/A ratio, and deceleration time (DT) of early filling velocity. Early  
53  
54  
55  
56  
57  
58  
59  
60

1  
2  
3 diastolic mitral annular velocities ( $e'$ ) was measured from both septal and lateral annulus. Left  
4 atrium volume was calculated by tracing the endocardial borders at end-systole in the apical  
5 four-and two-chamber views, with LA volume index calculated by adjusting to the patient's  
6 body surface index (BSA).  
7

8  
9  
10  
11  
12 Systolic pulmonary arterial pressure (sPAP) was determined by the maximal tricuspid  
13 regurgitant velocity and an estimation of right atrial pressure according to the vena cava width  
14 and responsiveness.  
15  
16

17  
18  
19 LV diameters including left ventricle end systolic and diastolic diameter (LVESd, LVEDd) were  
20 measured using lineal 2D echocardiography or M-mode parallel to the mitral valve annulus.  
21

22  
23  
24 Right ventricular (RV) size and function assessment was based on multiple views of the RV. An  
25 integrative qualitative grading of RV function was formulated by a specialized imaging  
26 cardiologist responsible for the echocardiographic study.  
27  
28  
29

### 30 31 32 33 Clinical data and outcome measures

34  
35 Baseline characteristics including age, sex and major co-morbidities were extracted from the  
36 electronic health record (EMR). Hospitalization for heart failure (HF) which occurred at our  
37 medical center alone were retrieved from the electronic health record. The date of mortality (if  
38 occurred) was automatically updated in the hospital records via the Ministry of Health.  
39

40  
41  
42 All the data obtained in the study were retrieved from the hospital anonymized database that  
43 includes all clinical and echocardiographic information.  
44

### 45 46 47 48 49 Statistical Analysis

50  
51  
52 Categorical variables are reported as numbers and percentages, and continuous variables are  
53 reported as means and standard deviations or medians and interquartile ranges (IQRs), as  
54  
55  
56  
57  
58  
59  
60



1  
2  
3 appropriate. Continuous variables were tested for normal distribution using histograms, Q-Q  
4  
5 Plots and normality tests (Kolmogorov-Smirnov and Shapiro-Wilk). Continuous variables were  
6  
7 compared between groups using independent Mann-Whitney test, post-hoc Bonferroni correction  
8  
9 applied to analyze subgroup comparison. Categorical variables were compared using Chi-square  
10  
11 test or Fisher's exact test, post-hoc Bonferroni correction applied to analyze subgroup  
12  
13 comparison.  
14  
15

16  
17 The AVA was divided into categories by means of a classification and regression model (CART)  
18  
19 for the prediction of HF hospitalization, with a minimum of 100 cases in parent node and  
20  
21 minimum of 50 cases in child node. The analysis selects the best predictor for splitting the data  
22  
23 into child nodes. A P value is given for each branch.  
24  
25

26 Long-term outcome (all-cause mortality or HF hospitalization) assessed using a Cox regression  
27  
28 model, also adjusted for clinical and echocardiographic parameters. The following variables  
29  
30 were included:  
31  
32

33 Clinical variables: Age, sex, chronic renal failure (CRF), hypertension, ischemic heart disease  
34  
35 (IHD), AF, HF, chronic obstructive pulmonary disease (COPD).  
36  
37

38 Echocardiographic variables: ejection fraction (EF), LVEDd, LVESd, degree of AR, RV  
39  
40 function and RV size. Of note, due to the expected effect of mVHD on LV filling indices and  
41  
42 forward flow (stroke volume), as the major hemodynamic consequences leading to HF  
43  
44 hospitalization, these parameters we evaluated in the COX regression model separately.  
45  
46

47 All statistical tests were two-sided, and a P-value of  $< .05$  was considered statistically significant.  
48

49 SPSS software was used for all statistical analysis (IBM SPSS statistics, version 25, Armonk,  
50  
51 NY, USA, 2017).  
52  
53  
54  
55  
56  
57  
58  
59  
60

## Results

### Patient Clinical Characteristics

The study cohort included 2933 patients with non-severe AS. Of whom, 2427 had  $\leq$ mild MR and 506  $>$ mild MR. Data regarding the etiology of  $>$  MR were available in 59% (299 patients), in whom 22 secondary and 277 with primary MR. Table 1 provides the patients' clinical characteristics.

The median follow-up time of the entire cohort was 1127 days (IQR 392-1999), during which 1572 patients (53.6%) had died and 435 patients (14.8%) had experienced a HF hospitalization. Compared with patients with  $\leq$ mild MR, patient with  $>$ mild MR were older (80.1 years, IQR 72.4-86.2 vs 83.2 years, IQR 76.3-88.6,  $P < 0.001$ ), with a predominance female population (45.8% vs 53%,  $P = 0.03$ ) respectively.

In addition, patients with  $>$ mild MR were more likely to have a history of AF (36.8% versus 22.4%,  $P < 0.001$ ), CRF (21.7% versus 12.9,  $P < 0.001$ ), hypertension (71.3% versus 62.5%,  $P < 0.001$ ) and IHD (45.5% versus 37.1%,  $P < 0.001$ ).

Examining outcomes, patient with  $>$ mild MR experienced a higher rate of HF hospitalizations (23.9% versus 12.9%,  $P < 0.001$ ) and increased all-cause mortality (66.2% versus 53.6%,  $P < 0.001$ ).

### Patient echocardiographic measurements

Patients' echocardiographic measurements in the entire cohort and according to severity of MR are presented in table 2.

Patients with  $>$ mild MR had slightly lower cardiac output values (5.03ml/m<sup>2</sup>, IQR 4.29-6.18 versus 5.64 (IQR 4.78-6.61,  $P < 0.001$ ) and a greater left ventricle end-systolic (31mm, IQR 26-

1  
2  
3 38, versus 28, IQR 25-33,  $P < 0.001$ ) and end-diastolic diameters (49mm, IQR 45-54 versus 47,  
4  
5 IQR 43-51,  $P < 0.001$ ).

6  
7 Proximal isovelocity hemispheric surface area (PISA) data were available only in a portion of  
8  
9 patients with >mild MR. These patients had an ERO area of  $0.1\text{cm}^2$  (IQR 0.1-0.2,  $n=184/514$ )  
10  
11 with a regurgitant volume of 26ml (IQR 17-35ml,  $n=105/330$ ).

12  
13 As expected, patients with >mild MR had an overall worse diastolic indices with a larger LA  
14  
15 volume index, shorter deceleration time, higher E/A ratio and elevated SPAP compared with  
16  
17 patient with  $\leq$ mild MR. The average  $e'$  for the entire cohort was mildly reduced (6, IQR 4.93-  
18  
19 7.21), with no difference between MR severity groups.

20  
21 Higher rates of RV dysfunction and RV dilatation were found in patients with >mild MR (Table  
22  
23 2).

### 24 25 26 27 28 **Aortic valve area optimal cutoff value**

29  
30 In patients with >mild MR, a classification tree analysis revealed a cutoff value of  $1.35\text{cm}^2$  to be  
31  
32 predictive for HF hospitalizations. Accordingly, we further divided both MR groups according to  
33  
34 the suggested AS cutoff value. Patients' clinical and echocardiographic measurements in these 4  
35  
36 sub-groups are presented in table 3.

### 37 38 39 40 41 42 Hemodynamic impact of AVA in patient with >mild MR

43  
44 Among patients with >mild MR, those with  $\text{AVA} \leq 1.35\text{cm}^2$  were older compared with patients  
45  
46 with  $\text{AVA} > 1.35\text{cm}^2$  (84.4 years, IQR 77.5-89.2 vs 81.2 years, IQR 73.6-87.3 respectively,  $P =$   
47  
48 0.002). There were no other statistically significant differences in baseline clinical characteristics  
49  
50 between these two sub-groups.  
51  
52  
53  
54  
55  
56  
57  
58  
59  
60

1  
2  
3 Patient with  $AVA \leq 1.35 \text{ cm}^2$  had lower CO compared with patients with an  $AVA > 1.35 \text{ cm}^2$  (4.77  
4 l/min, IQR 4.03-5.7 vs 5.93 l/min, IQR 4.85-6.62 respectively,  $P < 0.001$ ) and had elevated sPAP  
5 values (49mmHg, IQR 39-59 compared with 42mmHg, IQR 34-54  $p < 0.001$ ), whereas other  
6 diastolic or RV function indices did not significantly differ between the two groups (Table 3).  
7  
8  
9  
10  
11  
12  
13  
14

#### 15 Effect of AVA and MR severity on clinical outcomes

16  
17 The impact of MR grade and AVA on HF hospitalizations within each subgroup is presented in  
18 table 4.  
19

20  
21 In univariate Cox regression analysis (Figure 1), patients with >mild MR and an  $AVA \leq 1.35 \text{ cm}^2$   
22 had the highest rate of HF hospitalizations compared with patients  $\leq$ mild MR and an  
23  $AVA > 1.35 \text{ cm}^2$  (HR 3.1, IQR 2.4-4,  $P < 0.001$ ).  
24  
25

26  
27 AVA had more impact on patients' outcomes, since the presence of significant MR in patients  
28 with an  $AVA > 1.35 \text{ cm}^2$  was associated with increased rates of HF hospitalizations in univariate  
29 analysis (group 1 versus group 3, HR 1.6, IQR 1.1-2.3,  $P = 0.007$ ), this effect was lost after  
30 adjusting for echocardiographic parameters and/or clinical parameters. Furthermore, following  
31 adjustment for either clinical comorbidities or echocardiographic parameters only patients with a  
32 combination of >mild MR and  $AVA \leq 1.35 \text{ cm}^2$  had a higher HF hospitalizations rate.  
33  
34  
35  
36  
37  
38  
39  
40  
41

42 Analysis concerning all-cause mortality is available in Table S1 and Figure 1S. Patients with  
43 >mild MR and  $AVA \leq 1.35 \text{ cm}^2$  had higher mortality rates compared with patients with  $\leq$ mild MR  
44 and  $AVA > 1.35 \text{ cm}^2$ , even after adjusting for clinical and/or echocardiographic parameters  
45  
46  
47  
48  
49  
50

51 The effect of diastolic function on outcome is presented in table 4.  
52  
53  
54  
55  
56  
57  
58  
59  
60

1  
2  
3 The effect of surgical AV replacement in patients with >mild MR and  $AVA \leq 1.35 \text{ cm}^2$  (n=10, one  
4 patient with concomitant mitral valve intervention) on outcomes is presented in tables S2,S3 and  
5  
6 figure S2.  
7  
8  
9

## 10 11 12 13 14 15 **Discussion**

16  
17 This study investigated the clinical outcomes of patients with combined non-severe aortic  
18 stenosis (AS) and low-grade mitral regurgitation (MR). We found two key findings:  
19

- 20  
21 • Patients with combined non-severe AS and low-grade MR had lower cardiac output and  
22 impaired diastolic function compared to those without these conditions.  
23
- 24 • AVA between 1.0-1.35  $\text{cm}^2$  in the presence of more than mild MR was associated with  
25 worse clinical outcomes, even after accounting for other relevant  
26 factors. Conversely, patients with an AVA greater than 1.35  $\text{cm}^2$  had clinical outcomes  
27 comparable to those without AS, regardless of the degree of non-severe MR.  
28  
29  
30  
31  
32  
33  
34

35 AS and MR are the most prevalent valvular heart diseases in high-income countries [7].

36 However, unless the patient is planned for an aortic or coronary surgery, current guidelines  
37 recommend intervention only when these valvular lesions are severe [4-5] and limited  
38 recommendations exist for the management of patients with combined non-severe AS and MR.  
39

40 The hemodynamic effects of AS result from chronic increased afterload that leads to LV  
41 hypertrophy, diastolic dysfunction and increased systolic intra-ventricular pressures. MR, on the  
42 other hand, reduces afterload, SV and CO, but increases preload. The net effect of both lesions  
43 will reduce the net forward flow with augmentation of diastolic pressures [8-9], a finding  
44 compatible with our results.  
45  
46  
47  
48  
49  
50  
51  
52  
53  
54  
55  
56  
57  
58  
59  
60

1  
2  
3 While previous studies demonstrated increased mortality risk in moderate AS compared to no or  
4 mild AS [10-12], the impact of combined non-severe AS and low-grade MR remained less  
5 explored. Similar to our finding, smaller studies found predictors of poor outcome in this  
6 population, including  $\geq$ moderate MR, as well as lower range AVA [13] or stage 2 cardiac  
7 structural abnormalities such as either LA enlargement or  $>$ mild MR (only 9 patients in total)  
8 [14-15]. Notably, Benfari et al. [16] showed that in patients with trans-aortic velocity  $>2.5$ m/s  
9 and AVA  $>1$ cm<sup>2</sup>, an MR ERO area  $>0.1$ cm<sup>2</sup> was associated with a higher rates of HF  
10 hospitalizations or death. Our study adds to this evidence by highlighting the specific association  
11 between AVA size and clinical outcomes in the context of non-severe AS and low-grade MR.  
12 Our cohort's all-cause mortality rate was higher compared to existing studies on severe [17] or  
13 moderate AS [18]. While baseline co-morbidities and the presence of MR in our cohort might  
14 contribute to this finding, the most likely explanation is the older age of our study population  
15 (80.1 vs. 77.8 years in severe AS and 74 years in moderate AS cohorts).  
16  
17  
18  
19  
20  
21  
22  
23  
24  
25  
26  
27  
28  
29  
30  
31  
32

33 In clinical practice, it is challenging to determine the optimal timing for valvular correction of  
34 mVHD. Our data, encompassing almost 3,000 patients with comprehensive echocardiographic  
35 evaluation and valid clinical outcomes, suggest that patients with combined  $>$ mild MR and  
36 AVA  $\leq 1.35$ cm<sup>2</sup> have worse clinical outcomes and as such could benefit from close follow-up  
37 visits and frequent serial evaluation by a multidisciplinary heart valve team. It remains to be  
38 seen, however, whether early interventions could improve the clinical outcome of these patients.  
39  
40  
41  
42  
43  
44  
45  
46  
47  
48

49 Several important limitations should be addressed. First, this is a single-center retrospective  
50 study; thus, prospective data are needed to further establish its findings. Second, due to relatively  
51 small number of patient with combined non-severe AS and MR we did not divide our cohort into  
52  
53  
54  
55  
56  
57  
58  
59  
60

1  
2  
3 a learning and validation groups, consequently reducing the internal validity of the study. Third,  
4  
5 due to the observational nature of the design, we cannot definitively prove a causal relationship  
6  
7 between the valvular abnormalities or their individual impact on outcomes. Last, as we excluded  
8  
9 patient with other left sided valvular abnormalities, the current finding should not be applied to  
10  
11 other mVHD.  
12  
13

14 Our study suggests that combined non-severe aortic stenosis (AS) and low-grade mitral  
15  
16 regurgitation (MR) may be associated with worse clinical outcomes, particularly when the aortic  
17  
18 valve area (AVA) falls below 1.35 cm<sup>2</sup>. This finding highlights the need for further investigation  
19  
20 into the potential benefits of early intervention for these patients. Future studies could explore  
21  
22 whether early intervention strategies, such as valve replacement or repair, can improve patients  
23  
24 outcomes in this specific population  
25  
26  
27  
28  
29  
30  
31  
32  
33  
34  
35  
36  
37  
38  
39  
40  
41  
42  
43  
44  
45  
46  
47  
48  
49  
50  
51  
52  
53  
54  
55  
56  
57  
58  
59  
60

### Contributorship statement

YG., YT., OH. contributed to the design and implementation of the research, to the analysis of the results and to the writing of the manuscript. MLP. and SB. were involved in planning and supervised the work. YG, ORS and DV were involved in data acquisition and creation of the database. All authors discussed the results and commented on the manuscript.

### Competing interests

none declared

### Funding

This research did not receive any specific grant from funding agencies in the public, commercial, or not-for-profit sectors.

### Data Sharing Statement

The data that support the findings of this study are available from the corresponding author upon reasonable request.

### Consent

The study was reviewed and approved by the Institutional Review Board with a waiver of informed consent. Approval number – TLV-0111-18

### Patient and Public Involvement

Patients or the public were not involved in the design, or conduct, or reporting, or dissemination plans of our research



## References

1. DOI: 10.1161/CIRCIMAGING.118.007862. Unger P, Pibarot P, Tribouilloy C, Lancellotti P, Maisano F, Iung B, Piérard L; European Society of Cardiology Council on Valvular Heart Disease. Multiple and Mixed Valvular Heart Diseases. *Circ Cardiovasc Imaging*. 2018 Aug;11(8)
2. DOI: 10.1016/s0195-668x(03)00201-x. Iung B, Baron G, Butchart EG, Delahaye F, Gohlke-Bärwolf C, Levang OW, Tornos P, Vanoverschelde JL, Vermeer F, Boersma E, Ravaud P, Vahanian A. A prospective survey of patients with valvular heart disease in Europe: The Euro Heart Survey on Valvular Heart Disease. *Eur Heart J*. 2003 Jul;24(13):1231-43.
3. DOI: 10.1136/heartjnl-2016-310894. Andell P, Li X, Martinsson A, Andersson C, Stagmo M, Zöller B, Sundquist K, Smith JG. Epidemiology of valvular heart disease in a Swedish nationwide hospital-based register study. *Heart*. 2017; 103:1696–1703.
4. DOI: 10.1161/CIR.0000000000000932. Otto CM, Nishimura RA, Bonow RO, Carabello BA, Erwin JP 3rd, Gentile F, Jneid H, Krieger EV, Mack M, McLeod C, O'Gara PT, Rigolin VH, Sundt TM 3rd, Thompson A, Toly C. 2020 ACC/AHA Guideline for the Management of Patients With Valvular Heart Disease: Executive Summary: A Report of the American College of Cardiology/American Heart Association Joint Committee on Clinical Practice Guidelines. *Circulation*. 2021 Feb 2;143(5):e35-e71.
5. DOI: 10.1093/eurheartj/ehab395. Vahanian A, Beyersdorf F, Praz F, Milojevic M, Baldus S, Bauersachs J, Capodanno D, Conradi L, De Bonis M, De Paulis R, Delgado V, Freemantle N, Gilard M, Haugaa KH, Jeppsson A, Jüni P, Pierard L, Prendergast BD, Sádaba JR, Tribouilloy C, Wojakowski W; ESC/EACTS Scientific Document Group.

- 1  
2  
3 2021 ESC/EACTS Guidelines for the management of valvular heart disease. *Eur Heart J*.  
4  
5 2022 Feb 12;43(7):561-632.  
6  
7  
8 6. DOI: 10.1016/j.echo.2005.10.005. Lang RM, Bierig M, Devereux RB, Flachskampf FA,  
9  
10 Foster E, Pellikka PA, Picard MH, Roman MJ, Seward J, Shanewise JS, Solomon SD,  
11  
12 Spencer KT, Sutton MS, Stewart WJ; Chamber Quantification Writing Group; American  
13  
14 Society of Echocardiography's Guidelines and Standards Committee; European  
15  
16 Association of Echocardiography. Recommendations for chamber quantification: a report  
17  
18 from the American Society of Echocardiography's Guidelines and Standards Committee  
19  
20 and the Chamber Quantification Writing Group, developed in conjunction with the  
21  
22 European Association of Echocardiography, a branch of the European Society of  
23  
24 Cardiology. *J Am Soc Echocardiogr*. 2005 Dec;18(12):1440-63.  
25  
26  
27  
28 7. DOI: 10.3390/medsci10020032. Aluru JS, Barsouk A, Saginala K, Rawla P, Barsouk A.  
29  
30 Valvular Heart Disease Epidemiology. *Med Sci (Basel)*. 2022 Jun 15;10(2):32.  
31  
32  
33 8. DOI: 10.1016/j.ccl.2019.09.002. Unger P, Tribouilloy C. Aortic Stenosis with Other  
34  
35 Concomitant Valvular Disease: Aortic Regurgitation, Mitral Regurgitation, Mitral  
36  
37 Stenosis, or Tricuspid Regurgitation. *Cardiol Clin*. 2020 Feb;38(1):33-46.  
38  
39  
40 9. DOI: 10.3389/fcvm.2021.744497. Mantovani F, Fanti D, Tafciu E, Fezzi S, Setti M,  
41  
42 Rossi A, Ribichini F, Benfari G. When Aortic Stenosis Is Not Alone: Epidemiology,  
43  
44 Pathophysiology, Diagnosis and Management in Mixed and Combined Valvular Disease.  
45  
46 *Front Cardiovasc Med*. 2021 Oct 15;8:744497.  
47  
48  
49 10. DOI: 10.1016/j.echo.2021.02.014. Mann TD, Loewenstein I, Ben Assa E, Topilsky Y.  
50  
51 Natural History of Moderate Aortic Stenosis with Preserved and Low Ejection Fraction. *J*  
52  
53 *Am Soc Echocardiogr*. 2021 Jul;34(7):735-743. Epub 2021 Feb 27. PMID: 33652083.  
54  
55  
56  
57  
58  
59  
60

- 1  
2  
3 11. DOI: 10.1136/openhrt-2021-001743. Pankayatselvan V, Raber I, Playford D, Stewart S,  
4  
5 Strange G, Strom JB. Moderate aortic stenosis: culprit or bystander? *Open Heart*. 2022  
6  
7 Jan;9(1):e001743.  
8  
9
- 10 12. DOI: 10.1016/j.jcin.2022.06.022. Coisne A, Scotti A, Latib A, Montaigne D, Ho EC,  
11  
12 Ludwig S, Modine T, Généreux P, Bax JJ, Leon MB, Bauters C, Granada JF. Impact of  
13  
14 Moderate Aortic Stenosis on Long-Term Clinical Outcomes: A Systematic Review and  
15  
16 Meta-Analysis. *JACC Cardiovasc Interv*. 2022 Aug 22;15(16):1664-1674.  
17  
18
- 19 13. DOI: 10.1532/hsf.2971. Bae HJ, Hwang J, Han S, Hur SH, Chung JW, Kim H. Long  
20  
21 Term Clinical Outcomes in Patients with Moderate Aortic Stenosis. *Heart Surg Forum*.  
22  
23 2020 May 28;23(3):E358-E365.  
24  
25
- 26 14. DOI: 10.1016/j.jacc.2019.04.065. Tastet L, Tribouilloy C, Maréchaux S, Vollema EM,  
27  
28 Delgado V, Salaun E, Shen M, Capoulade R, Clavel MA, Arsenault M, Bédard É,  
29  
30 Bernier M, Beaudoin J, Narula J, Lancellotti P, Bax JJ, Généreux P, Pibarot P. Staging  
31  
32 Cardiac Damage in Patients With Asymptomatic Aortic Valve Stenosis. *J Am Coll*  
33  
34 *Cardiol*. 2019 Jul 30;74(4):550-563.  
35  
36
- 37 15. DOI: 10.1016/j.jcmg.2021.04.009. Amanullah MR, Pio SM, Ng ACT, Sin KYK, Marsan  
38  
39 NA, Ding ZP, Leon MB, Généreux P, Delgado V, Ewe SH, Bax JJ. Prognostic  
40  
41 Implications of Associated Cardiac Abnormalities Detected on Echocardiography in  
42  
43 Patients With Moderate Aortic Stenosis. *JACC Cardiovasc Imaging*. 2021  
44  
45 Sep;14(9):1724-1737.  
46  
47
- 48 16. DOI: 10.1016/j.amjcard.2020.09.016 γBenfari G, Setti M, Nistri S, Fanti D, Maffei C,  
49  
50 Tafciu E, Pighi M, Cicoira M, Ribichini FL, Rossi A. Relevance of Functional Mitral  
51  
52 Regurgitation in Aortic Valve Stenosis. *Am J Cardiol*. 2020 Dec 1;136:115-121.  
53  
54  
55  
56  
57  
58  
59  
60

- 1  
2  
3 17. doi: 10.1038/s41598-017-15316-6. Minamino-Muta E, Kato T, Morimoto T, Taniguchi  
4 T, Shiomi H, Nakatsuma K, Shirai S, Ando K, Kanamori N, Murata K, Kitai T, Kawase  
5 Y, Miyake M, Izumi C, Mitsuoka H, Kato M, Hirano Y, Matsuda S, Nagao K, Inada T,  
6 Murakami T, Takeuchi Y, Yamane K, Toyofuku M, Ishii M, Inoko M, Ikeda T, Komasa  
7 A, Tada E, Ishii K, Hotta K, Higashitani N, Jinnai T, Kato Y, Inuzuka Y, Maeda C,  
8 Morikami Y, Saito N, Sakata R, Minatoya K, Kimura T. Causes of Death in Patients with  
9 Severe Aortic Stenosis: An Observational study. *Sci Rep.* 2017 Nov 7;7(1):14723.  
10  
11  
12  
13  
14  
15  
16  
17  
18  
19 18. doi: 10.1016/j.jacc.2019.08.004. Strange G, Stewart S, Celermajer D, Prior D, Scalia  
20 GM, Marwick T, Ilton M, Joseph M, Codde J, Playford D; National Echocardiography  
21 Database of Australia contributing sites. Poor Long-Term Survival in Patients With  
22 Moderate Aortic Stenosis. *J Am Coll Cardiol.* 2019 Oct 15;74(15):1851-1863. Epub 2019  
23  
24  
25  
26  
27  
28  
29  
30  
31  
32  
33  
34  
35  
36  
37  
38  
39  
40  
41  
42  
43  
44  
45  
46  
47  
48  
49  
50  
51  
52  
53  
54  
55  
56  
57  
58  
59  
60

**Table 1** | Patients' clinical Characteristics in the entire cohort and according to severity of mitral regurgitation

|                               | All patients<br>(n=2933)     | Patients with up to mild<br>MR (n=2427) | Patient with greater than<br>mild MR (n=506) | P value |
|-------------------------------|------------------------------|-----------------------------------------|----------------------------------------------|---------|
| Age (years) <sup>a</sup>      | 80.64 (73.16-86.7)           | 80.11 (72.42-86.24)                     | 83.15 (76.3-88.57)                           | <0.001  |
| Follow-up (days) <sup>a</sup> | 1127.54 (392.45-<br>1998.65) | 1227.27 (488.60-2100.26)                | 721.52 (150.39-1471.61)                      | <0.001  |
| Sex (Female)                  | 1379 (47)                    | 1111 (45.8)                             | 268 (53)                                     | 0.03    |
| Deceased during<br>Follow-up  | 1571 (53.6)                  | 1236 (50.9)                             | 335 (66.2)                                   | <0.001  |
| Heart Failure admission       | 435 (14.8)                   | 314 (12.9)                              | 121 (23.9)                                   | <0.001  |
| AF                            | 657 (22.4)                   | 471 (19.4)                              | 186 (36.8)                                   | <0.001  |
| CRF                           | 423 (14.4)                   | 313 (12.9)                              | 110 (21.7)                                   | <0.001  |
| Malignancy                    | 642 (21.9)                   | 528 (21.8)                              | 114 (22.5)                                   | 0.702   |
| Hypertension                  | 1877 (64)                    | 1516 (62.5)                             | 361 (71.3)                                   | <0.001  |
| DM                            | 965 (32.9)                   | 801 (33)                                | 164 (32.4)                                   | 0.796   |
| CVA/TIA                       | 379 (12.9)                   | 305 (12.6)                              | 74 (14.6)                                    | 0.209   |
| IHD                           | 1131 (38.6)                  | 901 (37.1)                              | 230 (45.5)                                   | <0.001  |
| COPD                          | 269 (9.2)                    | 223 (9.2)                               | 46 (9.1)                                     | 0.945   |

<sup>a</sup>Median and interquartile range. All other values represent the number of patients and percentages

AF – Atrial fibrillation; CRF – Chronic renal failure; DM – Diabetes mellitus; CVA – Cerebrovascular accident; TIA – transient ischemic attack; IHD – Ischemic heart disease; COPD – Chronic obstructive pulmonary disease

**Table 2 | Patients' echocardiographic measurements in the entire cohort and according to severity of mitral regurgitation**

|                                        |                      | All patients (n=2933) | Patients with up to mild MR (n=2427) | Patient with greater than mild MR (n=506) | P value |
|----------------------------------------|----------------------|-----------------------|--------------------------------------|-------------------------------------------|---------|
| Ejection Fraction a                    |                      | 60 (55-60)            | 60 (55-60)                           | 55 (45-60)                                | <0.001  |
| Cardiac output (liter/min) a           |                      | 5.56 (4.67-6.53)      | 5.64 (4.78-6.61)                     | 5.03 (4.29-6.18)                          | <0.001  |
| LVEDd (mm) a                           |                      | 47 (43-51)            | 47 (43-51)                           | 49 (45-54)                                | <0.001  |
| LVESd (mm) a                           |                      | 29 (25-34)            | 28 (25-33)                           | 31 (26-38)                                | <0.001  |
| Aortic valve area (cm <sup>2</sup> ) a |                      | 1.4 (1.2-1.6)         | 1.4 (1.2-1.7)                        | 1.3 (1.1-1.5)                             | <0.001  |
| Peak aortic gradient (mmHg) a          |                      | 26 (21-34)            | 27 (22-35)                           | 26 (21-33)                                | 0.045   |
| Mean aortic gradient (mmHg) a          |                      | 15 (12-20)            | 15 (12-20)                           | 15 (11-19)                                | 0.018   |
| LAVI (ml/m <sup>2</sup> ) a            |                      | 42.7 (33.5-53.5)      | 40.3 (32.2-50.8)                     | 53.1 (44-65.7)                            | <0.001  |
| Deceleration time (ms) a               |                      | 219 (174-274)         | 225 (180-275)                        | 187 (153-241)                             | <0.001  |
| E/e' a                                 |                      | 14.02 (10.97-18.34)   | 13.62 (10.54-17.7)                   | 17.05 (13.18-22.39)                       | <0.001  |
| Average e' a                           |                      | 6 (4.93-7.21)         | 6 (4.96-7.2)                         | 6 (4.73-7.35)                             | 0.452   |
| E/A ratio a                            |                      | 0.8 (0.7-1.1)         | 0.8 (0.6-1.1)                        | 1.1 (0.9-1.6)                             | <0.001  |
| sPAP (mmHg) a                          |                      | 36 (30-47)            | 34 (29-44)                           | 46 (37-58)                                | <0.001  |
| Aortic valve regurgitation             | None                 | 1485 (50.6)           | 1288 (53.1)                          | 197 (38.9)                                | <0.001  |
|                                        | minimal              | 577 (19.7)            | 478 (19.7)                           | 99 (19.6)                                 |         |
|                                        | mild                 | 685 (23.4)            | 532 (21.9)                           | 153 (30.2)                                |         |
|                                        | mild to moderate     | 186 (6.3)             | 129 (5.3)                            | 57 (11.3)                                 |         |
| Right Ventricle function               | Normal               | 2668 (91)             | 2264 (93.3)                          | 404 (79.8)                                | <0.001  |
|                                        | Mild dysfunction     | 207 (7.1)             | 131 (5.4)                            | 76 (15)                                   |         |
|                                        | Moderate dysfunction | 51 (1.7)              | 29 (1.2)                             | 22 (4.3)                                  |         |
|                                        | Severe dysfunction   | 7 (0.2)               | 3 (0.1)                              | 4 (0.8)                                   |         |
| Right Ventricle size                   | Normal               | 2593 (88.4)           | 2208 (91)                            | 385 (76.1)                                | <0.001  |
|                                        | Mild dilatation      | 257 (8.8)             | 165 (6.8)                            | 92 (18.2)                                 |         |
|                                        | Moderate dilatation  | 63 (2.1)              | 41 (1.7)                             | 22 (4.3)                                  |         |
|                                        | Severe dilatation    | 20 (0.7)              | 13 (0.5)                             | 7 (1.4)                                   |         |

<sup>a</sup>Median and interquartile range. All other values represent the number of patients and percentages

LVEDd – Left ventricle end diastolic diameter; LVESd – Left ventricle end systolic diameter; LAVI – Left atrial volume index; sPAP – Systolic pulmonary artery pressure;

**Table 3** | Patients' clinical and echocardiographic measurements according to MR severity and Aortic valve area of 1.35cm<sup>2</sup>

|                                                   | MR ≤ mild         |                   |        | MR > Mild        |                  |        |                   |                   |
|---------------------------------------------------|-------------------|-------------------|--------|------------------|------------------|--------|-------------------|-------------------|
|                                                   | AVA > 1.35        | AVA ≤1.35         |        | AVA > 1.35       | AVA ≤1.35        |        |                   |                   |
|                                                   | Group 1<br>N=1333 | Group 2<br>N=1094 | P      | Group 3<br>N=211 | Group 4<br>N=295 | P      | P<br>Group<br>2-4 | P<br>Group<br>1-3 |
| Age (years) <sup>a</sup>                          | 79.3 (70.7-85.6)  | 81.46 (74.5-86.7) | <0.001 | 81.2 (73.6-87.4) | 84.4 (77.5-89.2) | 0.002  | <0.001            | 0.027             |
| Follow-up (days) <sup>a</sup>                     | 1393 (541-2178)   | 1107 (432-1955)   | 0.002  | 1006 (242-1751)  | 574 (112-1249)   | 0.003  | <0.001            | <0.001            |
| Sex (Female)                                      | 527 (39.5)        | 584 (53.4)        | <0.001 | 103 (48.8)       | 165 (55.9)       | NS     | NS                | NS                |
| Deceased during follow-up                         | 647 (48.4)        | 589 (53.8)        | <0.001 | 124 (58.8)       | 211 (71.5)       | 0.017  | <0.001            | 0.035             |
| Heart Failure admission                           | 176 (13.2)        | 138 (12.6)        | NS     | 38 (18)          | 83 (28.1)        | 0.024  | <0.001            | NS                |
| AF                                                | 257 (19.3)        | 214 (19.6)        | NS     | 78 (37)          | 108 (36.6)       | NS     | 0.012             | <0.001            |
| CRF                                               | 172 (12.9)        | 141 (12.9)        | NS     | 51 (24.2)        | 59 (20)          | NS     | 0.012             | <0.001            |
| Malignancy                                        | 295 (22.1)        | 233 (21.3)        | NS     | 45 (21.3)        | 69 (23.4)        | NS     | NS                | NS                |
| HTN                                               | 853 (64)          | 663 (60.6)        | NS     | 145 (68.7)       | 216 (73.2)       | NS     | <0.001            | NS                |
| DM                                                | 439 (32.9)        | 362 (33.1)        | NS     | 70 (33.2)        | 94 (31.9)        | NS     | NS                | NS                |
| CUA/TIA                                           | 167 (12.5)        | 138 (12.6)        | NS     | 26 (12.3)        | 48 (16.3)        | NS     | NS                | NS                |
| IHD                                               | 512 (38.4)        | 389 (35.6)        | NS     | 99 (46.9)        | 131 (44.4)       | NS     | 0.032             | NS                |
| COPD                                              | 139 (10.4)        | 84 (7.7)          | NS     | 15 (7.1)         | 31 (10.5)        | NS     | NS                | NS                |
| LV EF <sup>a</sup>                                | 60 (55-60)        | 60 (55-60)        | 1      | 60 (45-60)       | 55 (45-60)       | 0.514  | <0.001            | 0.001             |
| Cardiac output (liter/min) <sup>a</sup>           | 6.05 (5.1-7)      | 5.01 (4.3-5.9)    | <0.001 | 5.9 (4.9-6.6)    | 4.8 (4.0-5.7)    | <0.001 | 0.058             | 0.001             |
| LVEDd (mm) <sup>a</sup>                           | 47 (43-51)        | 46 (42-51)        | 0.019  | 50 (46-55)       | 48 (44-54)       | 0.18   | <0.001            | <0.001            |
| LVESd (mm) <sup>a</sup>                           | 29 (25-33)        | 28 (25-33)        | 0.334  | 31 (27-39)       | 31 (26-38)       | 1      | <0.001            | <0.001            |
| Aortic valve area (cm <sup>2</sup> ) <sup>a</sup> | 1.6 (1.5-1.9)     | 1.2 (1.1-1.3)     | <0.001 | 1.6 (1.4-1.8)    | 1.13 (1.08-1.26) | <0.001 | 1                 | 0.725             |
| Peak aortic gradient (mmHg) <sup>a</sup>          | 24 (20-30)        | 31 (24-40)        | <0.001 | 23 (19-29)       | 29 (22-38)       | <0.001 | 0.001             | 0.491             |
| Mean aortic gradient (mmHg) <sup>a</sup>          | 14 (11-17)        | 18 (14-24)        | <0.001 | 13 (11-16)       | 17 (13-21)       | <0.001 | <0.001            | 0.294             |
| LAVI (ml/m <sup>2</sup> ) <sup>a</sup>            | 40 (32.1-50.6)    | 40.8 (32.4-51)    | 1      | 54.1 (44.66-2)   | 52.1 (44.2-65)   | 1      | <0.001            | <0.001            |
| Deceleration time (ms) <sup>a</sup>               | 225 (182-275)     | 224 (180-277)     | 1      | 208 (162-254)    | 180 (148-229)    | 0.056  | <0.001            | 0.001             |
| E/e' <sup>a</sup>                                 | 13.2 (10.2-17.1)  | 14 (11-18.2)      | 0.001  | 16.3 (12.6-22)   | 17.6 (14-22.6)   | 0.425  | <0.001            | <0.001            |
| Average e' <sup>a</sup>                           | 6.2 (5.1-7.4)     | 5.8 (4.7-7)       | <0.001 | 6 (4.7-7.5)      | 6 (4.7-7.2)      | 1      | 1                 | 1                 |

1  
2

|    |                                        |                  |               |             |               |               |            |        |        |        |
|----|----------------------------------------|------------------|---------------|-------------|---------------|---------------|------------|--------|--------|--------|
| 3  | E/A ratio <sup>a</sup>                 | 0.8 (0.7-1.1)    | 0.8 (0.6-1.1) | 1           | 1.1 (0.8-1.5) | 1.2 (0.9-1.7) | 0.451      | <0.001 | <0.001 |        |
| 4  | sPAP (mmHg) <sup>a</sup>               | 34 (28-43)       | 35 (29-45)    | 0.089       | 42 (34-54)    | 49 (39-59)    | <0.001     | <0.001 | <0.001 |        |
| 5  | MR ERO (cm <sup>2</sup> ) <sup>a</sup> | NA               | NA            |             | 0.1 (0.1-0.2) | 0.1 (0.1-0.2) | 0.148      |        |        |        |
| 6  | MR Rvol (ml) <sup>a</sup>              | NA               | NA            |             | 25 (17-35)    | 26 (17-34)    | 0.893      |        |        |        |
| 7  | AR                                     | None             | 739 (55.4)    | 549 (50.2)  | NS            | 82 (38.9)     | 115 (39)   | NS     | 0.005  | <0.001 |
| 8  |                                        | minimal          | 253 (19)      | 225 (20.6)  |               | 30 (14.2)     | 69 (23.4)  |        |        |        |
| 9  |                                        | mild             | 266 (20)      | 266 (24.3)  |               | 72 (34.1)     | 81 (27.5)  |        |        |        |
| 10 |                                        | mild to moderate | 75 (5.6)      | 54 (4.9)    |               | 27 (12.8)     | 30 (10.2)  |        |        |        |
| 11 | RV function                            | Normal           | 1245 (93.4)   | 1019 (93.1) | NS            | 173 (82)      | 231 (78.3) | NS     | <0.001 | <0.001 |
| 12 |                                        | Mild             | 72 (5.4)      | 59 (5.4)    |               | 31 (14.7)     | 45 (15.3)  |        |        |        |
| 13 |                                        | Moderate         | 15 (1.1)      | 14 (1.3)    |               | 6 (2.8)       | 16 (5.4)   |        |        |        |
| 14 |                                        | Severe           | 1 (0.1)       | 2 (0.2)     |               | 1 (0.5)       | 3 (1)      |        |        |        |
| 15 | RV size                                | Normal           | 1221 (91.6)   | 987 (90.2)  | NS            | 167 (79.1)    | 218 (73.9) | NS     | <0.001 | <0.001 |
| 16 |                                        | Mild             | 83 (6.2)      | 82 (7.5)    |               | 33 (15.6)     | 59 (20)    |        |        |        |
| 17 |                                        | Moderate         | 24 (1.8)      | 17 (1.6)    |               | 9 (4.3)       | 13 (4.4)   |        |        |        |
| 18 |                                        | Severe           | 5 (0.4)       | 8 (0.7)     |               | 2 (0.9)       | 5 (1.7)    |        |        |        |

26  
27

<sup>a</sup>Median and interquartile range. All other values represent the number of patients and percentages

29 AF – Atrial fibrillation; CRF – Chronic renal failure; DM – Diabetes mellitus; CVA –  
30 Cerebrovascular accident; TIA – transient ischemic attack; IHD – Ischemic heart disease; COPD  
31 – Chronic obstructive pulmonary disease; LVEDd – Left ventricle end diastolic diameter;  
32 LVESd – Left ventricle end systolic diameter; LAVI – Left atrial volume index; sPAP – Systolic  
33 pulmonary artery pressure; MR - Mitral Regurgitation; RV – Righth Ventricle; AR – Aortic  
34 regurgitation; LV EF – Left ventricle ejection fraction

36  
3738  
3940  
4142  
4344  
4546  
4748  
4950  
5152  
5354  
5556  
5758  
59

60



**Table 4 | Impact of MR grade and Aortic valve area on heart failure hospitalization**

|                                                                                                           | HR    | 95% CI      | P      |
|-----------------------------------------------------------------------------------------------------------|-------|-------------|--------|
| Up to mild MR +<br>AVA $\leq$ 1.35cm <sup>2</sup> versus AVA > 1.35cm <sup>2</sup>                        |       |             |        |
| Univariate analysis                                                                                       | 1.036 | 0.829-1.295 | 0.754  |
| Greater than mild MR +<br>AVA $\leq$ 1.35cm <sup>2</sup> versus AVA > 1.35cm <sup>2</sup>                 |       |             |        |
| Univariate                                                                                                | 1.893 | 1.288-2.781 | 0.001  |
| Adjusted for all clinical*                                                                                | 1.941 | 1.309-2.880 | <0.001 |
| Adjusted for all echocardiographic†                                                                       | 1.672 | 1.097-2.548 | 0.017  |
| Adjusted for both *†                                                                                      | 1.774 | 1.157-2.72  | 0.009  |
| Adjusted for Diastolic parameter # + Cardiac output                                                       | 1.555 | 0.833-2.904 | 0.166  |
| AVA > 1.35cm <sup>2</sup> +<br>MR up to mild versus greater than mild                                     |       |             |        |
| Univariate analysis                                                                                       | 1.624 | 1.143-2.308 | 0.007  |
| Adjusted for all clinical*                                                                                | 1.249 | 0.873-1.788 | 0.223  |
| Adjusted for all echocardiographic†                                                                       | 0.992 | 0.652-1.508 | 0.969  |
| Adjusted for both *†                                                                                      | 0.881 | 0.572-1.358 | 0.567  |
| Adjusted for Diastolic parameter # + Cardiac output                                                       | 0.645 | 0.356-1.168 | 0.148  |
| AVA $\leq$ 1.35cm <sup>2</sup> +<br>MR greater than mild versus up to mild                                |       |             |        |
| Univariate analysis                                                                                       | 3.056 | 2.324-4.018 | <0.001 |
| Adjusted for all clinical*                                                                                | 2.241 | 1.689-2.973 | <0.001 |
| Adjusted for all echocardiographic†                                                                       | 2.162 | 1.545-3.025 | <0.001 |
| Adjusted for both *†                                                                                      | 1.625 | 1.163-2.271 | 0.004  |
| Adjusted for Diastolic parameter # + Cardiac output                                                       | 1.816 | 1.135-2.906 | 0.013  |
| Greater than mild MR + AVA $\leq$ 1.35cm <sup>2</sup> versus<br>Up to mild MR + AVA > 1.35cm <sup>2</sup> |       |             |        |
| Univariate analysis                                                                                       | 3.089 | 2.374-4.019 | <0.001 |
| Adjusted for all clinical*                                                                                | 2.164 | 1.641-2.852 | <0.001 |
| Adjusted for all echocardiographic†                                                                       | 1.67  | 1.205-2.314 | 0.002  |
| Adjusted for both *†                                                                                      | 1.296 | 0.941-1.784 | 0.112  |
| Adjusted for Diastolic parameter # + Cardiac output                                                       | 1.175 | 0.708-1.948 | 0.533  |

1  
2  
3  
4 \* For clinical variables – Age, Sex, Atrial fibrillation, chronic renal failure Hypertension, Ischemic  
5 heart disease, COPD

6  
7 † For Echocardiographic variables – Ejection fraction, Left ventricle end diastolic diameter, Left  
8 ventricle end systolic diameter, Aortic valve regurgitation grade, right ventricle size, right  
9 ventricle function

10 # For Diastolic parameter – LAVI, DT, Average E/e', E/A ratio, sPAP  
11  
12  
13  
14  
15  
16  
17  
18  
19  
20  
21  
22  
23  
24  
25  
26  
27  
28  
29  
30  
31  
32  
33  
34  
35  
36  
37  
38  
39  
40  
41  
42  
43  
44  
45  
46  
47  
48  
49  
50  
51  
52  
53  
54  
55  
56  
57  
58  
59  
60

1  
2  
3 **Figure legend:**  
4  
5  
6  
7

8 Figure 1 – Univariate Cox regression analysis for HF hospitalization according to severity of MR  
9 and AVA  
10

11  
12 Figure S1 – Univariate Cox regression analysis for mortality according to severity of MR and  
13 AVA  
14

15  
16  
17 Figure S2 – Univariate Cox regression analysis for the Impact of Intervention (Surgical AVR) in  
18 patient with MR>mild and AVA $\leq$ 1.35cm<sup>2</sup>  
19  
20  
21  
22  
23  
24  
25  
26  
27  
28  
29  
30  
31  
32  
33  
34  
35  
36  
37  
38  
39  
40  
41  
42  
43  
44  
45  
46  
47  
48  
49  
50  
51  
52  
53  
54  
55  
56  
57  
58  
59  
60

1  
2  
3  
4  
5  
6  
7  
8  
9  
10  
11  
12  
13  
14  
15  
16  
17  
18  
19  
20  
21  
22  
23  
24  
25  
26  
27  
28  
29  
30  
31  
32  
33  
34  
35  
36  
37  
38  
39  
40  
41  
42  
43  
44  
45  
46  
47  
48  
49  
50  
51  
52  
53  
54  
55  
56  
57  
58  
59  
60

For peer review only

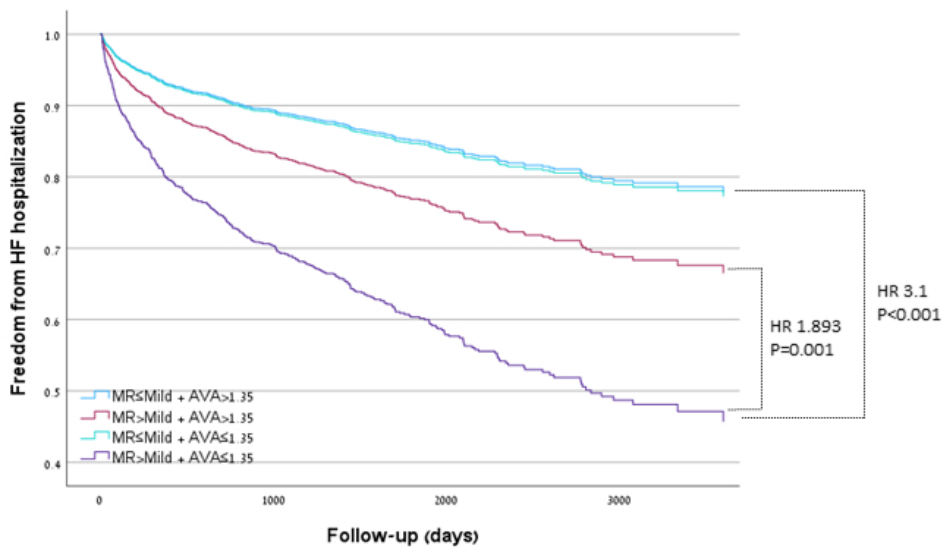

Figure 1

455x314mm (38 x 38 DPI)

**Table S1 | Impact of MR grade and Aortic valve area on mortality**

|                                                                                                           | HR    | 95% CI      | P      |
|-----------------------------------------------------------------------------------------------------------|-------|-------------|--------|
| Up to mild MR +<br>AVA $\leq$ 1.35cm <sup>2</sup> versus AVA > 1.35cm <sup>2</sup>                        |       |             |        |
| Univariate                                                                                                | 1.223 | 1.094-1.368 | <0.001 |
| Adjusted for all clinical*                                                                                | 1.15  | 1.027-1.288 | 0.015  |
| Adjusted for all echocardiographic†                                                                       | 1.168 | 1.032-1.321 | 0.014  |
| Adjusted for both *†                                                                                      | 1.116 | 0.984-1.266 | 0.087  |
| Adjusted for Diastolic parameter # + Cardiac output                                                       | 0.985 | 0.815-1.191 | 0.878  |
|                                                                                                           |       |             |        |
| Greater than mild MR +<br>AVA $\leq$ 1.35cm <sup>2</sup> versus AVA > 1.35cm <sup>2</sup>                 |       |             |        |
| Univariate                                                                                                | 1.426 | 1.142-1.78  | 0.002  |
| Adjusted for all clinical*                                                                                | 1.324 | 1.053-1.664 | 0.016  |
| Adjusted for all echocardiographic†                                                                       | 1.242 | 0.969       | 1.592  |
| Adjusted for both *†                                                                                      | 1.23  | 0.954-1.586 | 0.11   |
| Adjusted for Diastolic parameter # + Cardiac output                                                       | 1.176 | 0.818-1.689 | 0.382  |
|                                                                                                           |       |             |        |
| AVA > 1.35cm <sup>2</sup> +<br>MR up to mild versus greater than mild                                     |       |             |        |
| Univariate analysis                                                                                       | 1.431 | 1.181-1.735 | <0.001 |
| Adjusted for all clinical*                                                                                | 1.22  | 1.003-1.484 | 0.046  |
| Adjusted for all echocardiographic†                                                                       | 1.317 | 1.057-1.639 | 0.014  |
| Adjusted for both *†                                                                                      | 1.191 | 0.95-1.493  | 0.129  |
| Adjusted for Diastolic parameter # + Cardiac output                                                       | 1     | 0.74-1.353  | 0.998  |
|                                                                                                           |       |             |        |
| AVA $\leq$ 1.35cm <sup>2</sup> +<br>MR up to mild versus greater than mild                                |       |             |        |
| Univariate analysis                                                                                       | 1.684 | 1.438-1.972 | <0.001 |
| Adjusted for all clinical*                                                                                | 1.388 | 1.18-1.632  | <0.001 |
| Adjusted for all echocardiographic†                                                                       | 1.409 | 1.167-1.701 | <0.001 |
| Adjusted for both *†                                                                                      | 1.196 | 0.99-1.444  | 0.064  |
| Adjusted for Diastolic parameter # + Cardiac output                                                       | 1.055 | 0.798-1.395 | 0.706  |
|                                                                                                           |       |             |        |
| Greater than mild MR + AVA $\leq$ 1.35cm <sup>2</sup> versus<br>Up to mild MR + AVA > 1.35cm <sup>2</sup> |       |             |        |
| Univariate analysis                                                                                       | 2.049 | 1.753-2.396 | <0.001 |

|                                                     |       |             |        |
|-----------------------------------------------------|-------|-------------|--------|
| Adjusted for all clinical*                          | 1.543 | 1.312-1.815 | <0.001 |
| Adjusted for all echocardiographic†                 | 1.737 | 1.446-2.086 | <0.001 |
| Adjusted for both *†                                | 1.377 | 1.144-1.657 | <0.001 |
| Adjusted for Diastolic parameter # + Cardiac output | 1.127 | 0.84-1.513  | 0.425  |

\* For clinical variables – Age, Sex, Atrial fibrillation, chronic renal failure Hypertension, Ischemic heart disease, COPD

† For Echocardiographic variables – Ejection fraction, Left ventricle end diastolic diameter, Left ventricle end systolic diameter, Aortic valve regurgitation grade, right ventricle size, right ventricle function

# For Diastolic parameter – LAVI, DT, Average E/e', E/A ratio, sPAP

**Table S2** | Patients' clinical and echocardiographic measurements according to Intervention (Surgical AVR) in patient with MR>mild and AVA≤1.35cm<sup>2</sup>

|                                                   | MR > mild + AVA≤1.35cm <sup>2</sup> |                     |        |
|---------------------------------------------------|-------------------------------------|---------------------|--------|
|                                                   | No intervention (n=295)             | SAVR (n=10)         | P      |
| Age (years) <sup>a</sup>                          | 84.42 (77.51-89.21)                 | 65.77 (63.3-68.93)  | <0.001 |
| Sex (Female)                                      | 165 (55.9)                          | 5 (50)              | 0.71   |
| Deceased during Follow-up                         | 211 (71.5)                          | 4 (40)              | 0.032  |
| Heart Failure admission                           | 83 (28.1)                           | 1 (10)              | 0.207  |
| AF                                                | 108 (36.6)                          | 5 (50)              | 0.389  |
| CRF                                               | 59 (20)                             | 2 (20)              | 1      |
| Malignancy                                        | 69 (23.4)                           | 0                   | 0.082  |
| HTN                                               | 216 (73.2)                          | 7 (70)              | 0.821  |
| DM                                                | 94 (31.9)                           | 5 (50)              | 0.228  |
| QVA/TIA                                           | 48 (16.3)                           | 0                   | 0.165  |
| IHD                                               | 131 (44.4)                          | 6 (60)              | 0.33   |
| COPD                                              | 31 (10.5)                           | 0                   | 0.279  |
| LVEF <sup>a</sup>                                 | 55 (45-60)                          | 60 (45-60)          | 0.485  |
| Cardiac output (liter/min)                        | 4.77 (4.03-5.7)                     | 5.42 (4.45-7)       | 0.174  |
| LVEDd (mm) <sup>a</sup>                           | 48 (44-54)                          | 51 (49-57)          | 0.097  |
| LVESd (mm) <sup>a</sup>                           | 31 (26-38)                          | 31 (28-37)          | 0.888  |
| Aortic valve area (cm <sup>2</sup> ) <sup>a</sup> | 1.13 (1.08-1.26)                    | 1.15 (1.1-1.2)      | 0.775  |
| Peak aortic gradient (mmHg) <sup>a</sup>          | 29 (22-38)                          | 39 (37-45)          | 0.01   |
| Mean aortic gradient (mmHg) <sup>a</sup>          | 17 (13-21)                          | 23 (18-28)          | 0.009  |
| LA VI (ml/m <sup>2</sup> ) <sup>a</sup>           | 52.1 (44.2-65)                      | 47.5 (46.8-48.4)    | 0.442  |
| Deceleration time (ms) <sup>a</sup>               | 180 (148-229)                       | 197 (173-235)       | 0.327  |
| E/e' <sup>a</sup>                                 | 17.58 (14.03-22.64)                 | 19.37 (17.92-23.93) | 0.092  |



1  
2

|    |                         |                  |               |             |       |
|----|-------------------------|------------------|---------------|-------------|-------|
| 3  | E/A ratio <sup>a</sup>  |                  | 1.2 (0.9-1.7) | 1.2 (1-2.9) | 0.6   |
| 4  |                         |                  |               |             |       |
| 5  | PAP (mmHg) <sup>a</sup> |                  | 49 (39-59)    | 40 (38-50)  | 0.107 |
| 6  |                         |                  |               |             |       |
| 7  | AR                      | None             | 115 (39)      | 3 (30)      | 0.762 |
| 8  |                         | minimal          | 69 (23.4)     | 2 (20)      |       |
| 9  |                         | mild             | 81 (27.5)     | 3 (30)      |       |
| 10 |                         | mild to moderate | 30 (10.2)     | 2 (20)      |       |
| 11 |                         |                  |               |             |       |
| 12 |                         |                  |               |             |       |
| 13 | RV function             | Normal           | 231 (78.3)    | 10 (100)    | 0.433 |
| 14 |                         | Mild             | 45 (15.3)     | 0           |       |
| 15 |                         | Moderate         | 16 (5.4)      | 0           |       |
| 16 |                         | Severe           | 3 (1)         | 0           |       |
| 17 |                         |                  |               |             |       |
| 18 | RV size                 | Normal           | 218 (73.9)    | 10 (100)    | 0.322 |
| 19 |                         | Mild             | 59 (20)       | 0           |       |
| 20 |                         | Moderate         | 13 (4.4)      | 0           |       |
| 21 |                         | Severe           | 5 (1.7)       | 0           |       |
| 22 |                         |                  |               |             |       |
| 23 |                         |                  |               |             |       |
| 24 |                         |                  |               |             |       |

25  
26  
27  
28  
29  
30  
31  
32  
33  
34  
35  
36  
37  
38  
39  
40  
41  
42  
43  
44  
45  
46  
47  
48  
49  
50  
51  
52  
53  
54  
55  
56  
57  
58  
59  
60

<sup>a</sup>Median and interquartile range. All other values represent the number of patients and percentages

AF – Atrial fibrillation; CRF – Chronic renal failure; DM – Diabetes mellitus; CVA – Cerebrovascular accident; TIA – transient ischemic attack; IHD – Ischemic heart disease; COPD – Chronic obstructive pulmonary disease; LVEDd – Left ventricle end diastolic diameter; LVESd – Left ventricle end systolic diameter; LAVI – Left atrial volume index; sPAP – Systolic pulmonary artery pressure; MR - Mitral Regurgitation; RV – Righth Ventricle; AR – Aortic regurgitation; LV EF – Left ventricle ejection fraction

**Table S3 | Impact of Intervention (Surgical AVR) in patient with MR>mild and AVA $\leq$ 1.35cm<sup>2</sup>**

| HF hospitalization  | HR    | 95% CI      | P     |
|---------------------|-------|-------------|-------|
| Univariate          | 0.21  | 0.029-1.513 | 0.121 |
| Adjusted *          | 0.372 | 0.048-2.895 | 0.345 |
| All-Cause Mortality |       |             |       |
| Univariate          | 0.286 | 0.106-0.774 | 0.014 |
| Adjusted *          | 0.508 | 0.177-1.461 | 0.209 |

\* For Age, Left ventricle end diastolic diameter, Aortic valve Peak and mean gradient, Average E/e' ratio

Figure S1

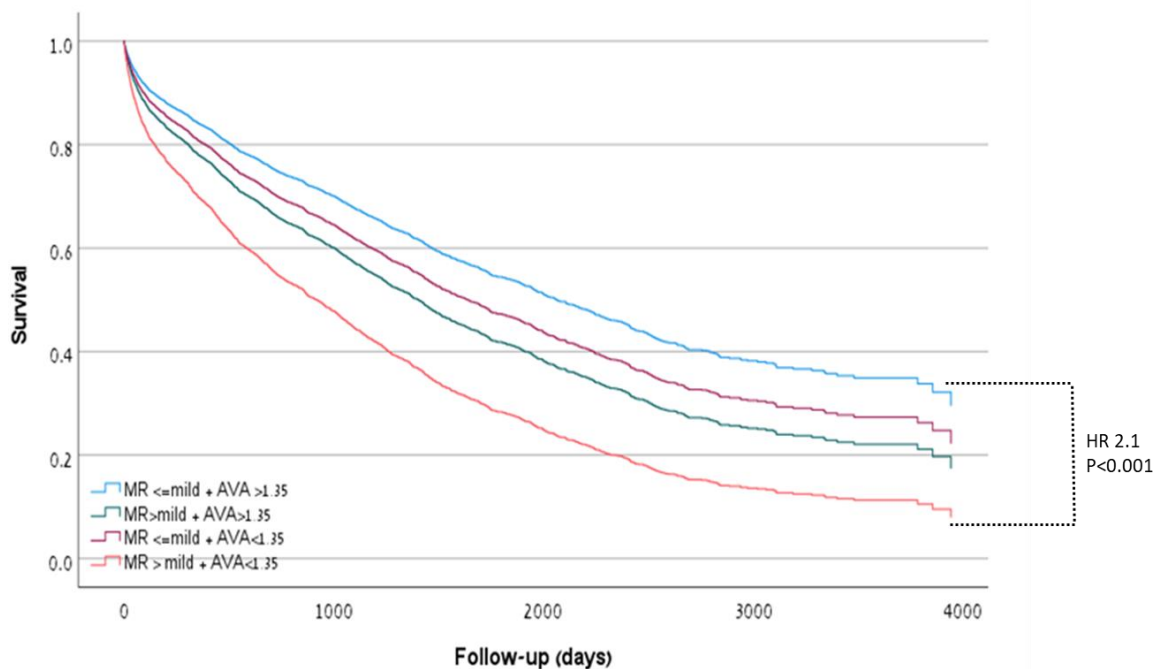

Figure S2

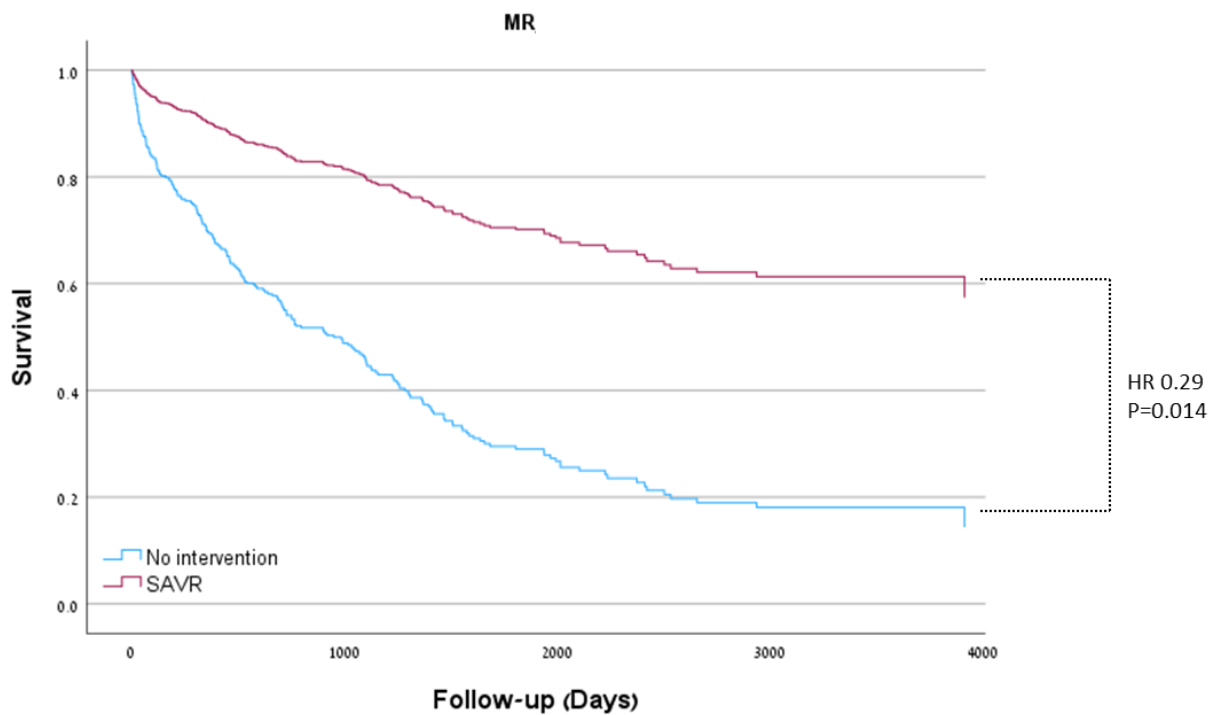

STROBE Statement—Checklist of items that should be included in reports of *cohort studies*

|                              | Item No | Recommendation                                                                                                                                                                                                                                                                                                         | Page No |
|------------------------------|---------|------------------------------------------------------------------------------------------------------------------------------------------------------------------------------------------------------------------------------------------------------------------------------------------------------------------------|---------|
| <b>Title and abstract</b>    | 1       | (a) Indicate the study's design with a commonly used term in the title or the abstract<br>(b) Provide in the abstract an informative and balanced summary of what was done and what was found                                                                                                                          | 2       |
| <b>Introduction</b>          |         |                                                                                                                                                                                                                                                                                                                        |         |
| Background/rationale         | 2       | Explain the scientific background and rationale for the investigation being reported                                                                                                                                                                                                                                   | 4       |
| Objectives                   | 3       | State specific objectives, including any prespecified hypotheses                                                                                                                                                                                                                                                       | 4       |
| <b>Methods</b>               |         |                                                                                                                                                                                                                                                                                                                        |         |
| Study design                 | 4       | Present key elements of study design early in the paper                                                                                                                                                                                                                                                                | 4       |
| Setting                      | 5       | Describe the setting, locations, and relevant dates, including periods of recruitment, exposure, follow-up, and data collection                                                                                                                                                                                        | 4       |
| Participants                 | 6       | (a) Give the eligibility criteria, and the sources and methods of selection of participants. Describe methods of follow-up<br>(b) For matched studies, give matching criteria and number of exposed and unexposed                                                                                                      | 5       |
| Variables                    | 7       | Clearly define all outcomes, exposures, predictors, potential confounders, and effect modifiers. Give diagnostic criteria, if applicable                                                                                                                                                                               | 5-6     |
| Data sources/<br>measurement | 8*      | For each variable of interest, give sources of data and details of methods of assessment (measurement). Describe comparability of assessment methods if there is more than one group                                                                                                                                   | 5-6     |
| Bias                         | 9       | Describe any efforts to address potential sources of bias                                                                                                                                                                                                                                                              | 5-6     |
| Study size                   | 10      | Explain how the study size was arrived at                                                                                                                                                                                                                                                                              | 5-6     |
| Quantitative variables       | 11      | Explain how quantitative variables were handled in the analyses. If applicable, describe which groupings were chosen and why                                                                                                                                                                                           | 7       |
| Statistical methods          | 12      | (a) Describe all statistical methods, including those used to control for confounding<br>(b) Describe any methods used to examine subgroups and interactions<br>(c) Explain how missing data were addressed<br>(d) If applicable, explain how loss to follow-up was addressed<br>(e) Describe any sensitivity analyses | 7       |
| <b>Results</b>               |         |                                                                                                                                                                                                                                                                                                                        |         |
| Participants                 | 13*     | (a) Report numbers of individuals at each stage of study—eg numbers potentially eligible, examined for eligibility, confirmed eligible, included in the study, completing follow-up, and analysed<br>(b) Give reasons for non-participation at each stage<br>(c) Consider use of a flow diagram                        | 8       |
| Descriptive data             | 14*     | (a) Give characteristics of study participants (eg demographic, clinical, social) and information on exposures and potential confounders<br>(b) Indicate number of participants with missing data for each variable of interest<br>(c) Summarise follow-up time (eg, average and total amount)                         | 8       |
| Outcome data                 | 15*     | Report numbers of outcome events or summary measures over time                                                                                                                                                                                                                                                         | 8       |

|    |                          |    |                                                                                                                                                                                                              |       |
|----|--------------------------|----|--------------------------------------------------------------------------------------------------------------------------------------------------------------------------------------------------------------|-------|
| 1  | Main results             | 16 | (a) Give unadjusted estimates and, if applicable, confounder-adjusted estimates and their precision (eg, 95% confidence interval). Make clear which confounders were adjusted for and why they were included | 9-10  |
| 2  |                          |    | (b) Report category boundaries when continuous variables were categorized                                                                                                                                    |       |
| 3  |                          |    | (c) If relevant, consider translating estimates of relative risk into absolute risk for a meaningful time period                                                                                             |       |
| 4  |                          |    |                                                                                                                                                                                                              |       |
| 5  |                          |    |                                                                                                                                                                                                              |       |
| 6  |                          |    |                                                                                                                                                                                                              |       |
| 7  |                          |    |                                                                                                                                                                                                              |       |
| 8  |                          |    |                                                                                                                                                                                                              |       |
| 9  | Other analyses           | 17 | Report other analyses done—eg analyses of subgroups and interactions, and sensitivity analyses                                                                                                               | 9-10  |
| 10 |                          |    |                                                                                                                                                                                                              |       |
| 11 | <b>Discussion</b>        |    |                                                                                                                                                                                                              |       |
| 12 |                          |    |                                                                                                                                                                                                              |       |
| 13 | Key results              | 18 | Summarise key results with reference to study objectives                                                                                                                                                     | 11    |
| 14 | Limitations              | 19 | Discuss limitations of the study, taking into account sources of potential bias or imprecision. Discuss both direction and magnitude of any potential bias                                                   | 12-13 |
| 15 |                          |    |                                                                                                                                                                                                              |       |
| 16 | Interpretation           | 20 | Give a cautious overall interpretation of results considering objectives, limitations, multiplicity of analyses, results from similar studies, and other relevant evidence                                   | 13    |
| 17 |                          |    |                                                                                                                                                                                                              |       |
| 18 |                          |    |                                                                                                                                                                                                              |       |
| 19 | Generalisability         | 21 | Discuss the generalisability (external validity) of the study results                                                                                                                                        | 13    |
| 20 |                          |    |                                                                                                                                                                                                              |       |
| 21 | <b>Other information</b> |    |                                                                                                                                                                                                              |       |
| 22 | Funding                  | 22 | Give the source of funding and the role of the funders for the present study and, if applicable, for the original study on which the present article is based                                                | 1     |
| 23 |                          |    |                                                                                                                                                                                                              |       |
| 24 |                          |    |                                                                                                                                                                                                              |       |

\*Give information separately for exposed and unexposed groups.

**Note:** An Explanation and Elaboration article discusses each checklist item and gives methodological background and published examples of transparent reporting. The STROBE checklist is best used in conjunction with this article (freely available on the Web sites of PLoS Medicine at <http://www.plosmedicine.org/>, Annals of Internal Medicine at <http://www.annals.org/>, and Epidemiology at <http://www.epidem.com/>). Information on the STROBE Initiative is available at <http://www.strobe-statement.org>.
